# Supplementary material for: Ethnic group inequalities in coverage with reproductive, maternal and child health interventions: cross-sectional analyses of national surveys in 16 Latin American and Caribbean countries
Source: PubMed Central journal article supplement (PMC6057134; doi:10.1016/s2214-109x(18)30300-0), 2018-07-14
Supplement: mmc1.pdf [file mmc1.pdf]

# THE LANCET

## Global Health

### Supplementary appendix

This appendix formed part of the original submission and has been peer reviewed. We post it as supplied by the authors.

Supplement to: Mesenburg MA, Restrepo-Mendez MC, Amigo H, et al. Ethnic group inequalities in coverage with reproductive, maternal and child health interventions: cross-sectional analyses of national surveys in 16 Latin American and Caribbean countries. *Lancet Glob Health* 2018; **6**: e902–13.

# THE LANCET Global Health

## **Supplementary appendix**

This appendix formed part of the original submission and has been peer reviewed. We post it as supplied by the authors.

Supplement to: Mesenburg, et al. Ethnic group inequalities in coverage with reproductive, maternal and child health interventions: cross-sectional analyses of national surveys in 16 Latin America and the Caribbean countries. Lancet Glob Health 2017.

## SUPPLEMENTARY APPENDIX

### Index to the supplementary appendix

#### Tables

|                                                                                                                                                                                                                                                              |    |
|--------------------------------------------------------------------------------------------------------------------------------------------------------------------------------------------------------------------------------------------------------------|----|
| Figure S1 - Countries included in the analyses. ....                                                                                                                                                                                                         | 4  |
| References to the final reports of the surveys included in the analyses. ....                                                                                                                                                                                | 5  |
| Table S1 - Percentage of missing data for countries included in the analyses. ....                                                                                                                                                                           | 7  |
| Panel - Ethnic groups in Suriname and Guyana.....                                                                                                                                                                                                            | 8  |
| Table S2 - Intervention coverage and sample size by ethnic group for countries included in the analyses. ....                                                                                                                                                | 10 |
| Figure S2 - Distribution of reference, afrodescendants and indigenous groups according to women's education, by country. ....                                                                                                                                | 12 |
| Figure S3 - Distribution of reference, afrodescendants and indigenous groups according to area of residence, by country. ....                                                                                                                                | 13 |
| Table S3 - Distribution of women aged 15-49 years in each ethnic group according to wealth, schooling and urban-rural residence. ....                                                                                                                        | 14 |
| Table S4 - Crude and adjusted coverage ratios (95%CI) for modern contraceptive use in indigenous women, compared to the reference category, by country. ....                                                                                                 | 16 |
| Table S5 - Crude and adjusted coverage ratios (95%CI) for antenatal care (four or more visits) in indigenous women, compared to the reference category, by country. ....                                                                                     | 17 |
| Table S6 - Crude and adjusted coverage ratios (95%CI) for skilled birth attendant in indigenous women, compared to the reference category, by country.....                                                                                                   | 18 |
| Table S7 - Crude and adjusted coverage ratios (95%CI) for DPT immunization in indigenous children, compared to the reference category, by country. ....                                                                                                      | 19 |
| Table S8 - Crude and adjusted coverage ratios (95%CI) for modern contraceptive use in afrodescendant women, compared to the reference. ....                                                                                                                  | 20 |
| Table S9 - Crude and adjusted coverage ratios (95%CI) for antenatal care (four or more visits) in afrodescendant women, compared to the reference. ....                                                                                                      | 21 |
| Table S10 - Crude and adjusted coverage ratios (95%CI) for skilled birth attendant in afrodescendant women, compared to the reference category, by country. ....                                                                                             | 22 |
| Table S11 - Crude and adjusted coverage ratios (95%CI) for DPT immunization in afrodescendant children, compared to the reference category, by country. ....                                                                                                 | 23 |
| Table S12 - Meta-analysis and meta-regression results for RMNCH interventions according to ethnic group in Latin America and the Caribbean. Co-variables include GDP per capita, urbanization and ethnic group composition of the countries under study..... | 24 |
| Table S13 - Indigenous groups and proportion of population in recent national censuses in the countries included in the analyses. ....                                                                                                                       | 25 |
| Table S14 - Legal standpoint of indigenous people in the countries included in the analyses. ...                                                                                                                                                             | 32 |
| Table S15 – P values for comparisons presented in the Figure 2 and Figure 3 of the manuscript. ....                                                                                                                                                          | 34 |

Table S16 – Intervention coverage by ethnic group (white, brown, black and indigenous),  
Brazil, 2006..... 35

Figure S1 - Countries included in the analyses.

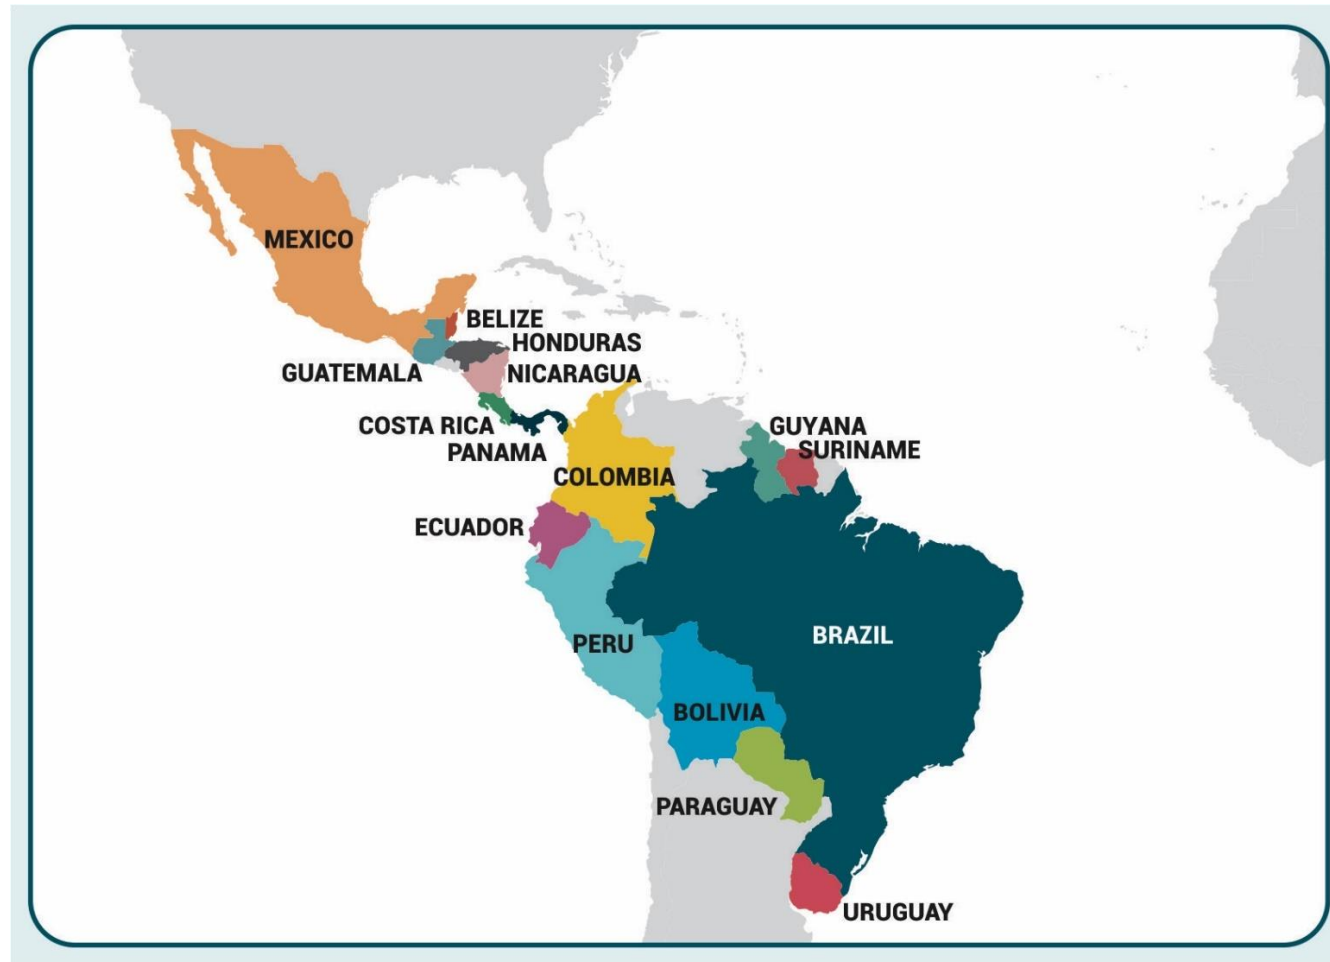

## References to the final reports of the surveys included in the analyses.

### DHS

1. Coa R, Ochoa LH. Bolivia: Encuesta Nacional de Demografía y Salud: ENDSA 2008. Calverton, Maryland: Ministerio de Salud y Deportes and Macro International.; 2009. Available from: [https://dhsprogram.com/pubs/pdf/FR228/FR228\[08Feb2010\].pdf](https://dhsprogram.com/pubs/pdf/FR228/FR228[08Feb2010].pdf).
2. Instituto Nacional de Estadística e Informática. Perú Encuesta Demográfica y de Salud Familiar - ENDES 2012. Lima, Perú: INEI/Perú; 2013. Available from: <http://dhsprogram.com/pubs/pdf/FR284/FR284.pdf>.
3. Ministerio de Salud Pública y Asistencia Social, Instituto Nacional de Estadística, Secretaría de Planificación y Programación del la Presidencia, ICF International. Guatemala. Encuesta Nacional de Salud Materno Infantil 2014-2015: informe final. Rockville, Maryland: MSPAS, INE, Segeplán and ICF International; 2017. Available from: <http://dhsprogram.com/pubs/pdf/FR318/FR318.pdf>.
4. Ojeda G, Ordonez M, Ochoa LH. Colombia Encuesta Nacional de Demografía y Salud 2010. Bogotá, Colombia: Profamilia; 2011. Available from: <https://dhsprogram.com/pubs/pdf/FR246/FR246.pdf>.
5. Secretaría de Salud, Instituto Nacional de Estadística, ICF International. Honduras Encuesta Nacional de Salud y Demografía 2011-2012. Tegucigalpa, Honduras: SS, INE and ICF International; 2013. Available from: <http://dhsprogram.com/pubs/pdf/FR274/FR274.pdf>.

### MODIFIED DHS

1. Brasil, Ministério da Saúde. PNDS 2006 Pesquisa Nacional de Demografia e Saúde da Criança e da Mulher. Brasília: MS; 2008. Available from: [http://bvsmms.saude.gov.br/bvs/publicacoes/pnds\\_crianca\\_mulher.pdf](http://bvsmms.saude.gov.br/bvs/publicacoes/pnds_crianca_mulher.pdf).

### MICS

1. Bureau of Statistics, Ministry of Health, UNICEF (United Nations Children's Fund). Guyana: Multiple Indicator Cluster Survey 2014. Key Findings. Georgetown: Bureau of Statistics, Ministry of Health and UNICEF; 2015. Available from: <https://goo.gl/ApDzzJ>.
2. Contraloría General de la República. Panamá: Encuesta de Indicadores Múltiples por Conglomerados, 2013. Resultados principales. Panamá: Contraloría General 2014. Available from: <https://goo.gl/vjakjR>.

3. Ministry of Social Affairs and Housing, General Bureau of Statistics. Suriname: Multiple Indicator Cluster Survey 2010. Final Report. Paramaribo: MSAH; 2012. Available from: <https://goo.gl/tGVAHt>.
4. República de Costa Rica Ministerio de Salud, UNICEF (United Nations Children's Fund). Costa Rica: Encuesta de Indicadores Múltiples por Conglomerados. San José: Ministerio de Salud; 2013. Available from: <https://goo.gl/qAfEU1>.
5. Statistical Institute of Belize. Belize: Multiple Indicator Cluster Survey 2011. Final Report. New York: UNICEF; 2012. Available from: <https://goo.gl/5LJ2qT>.
6. UNICEF (United Nations Children's Fund). Mexico. Encuesta Nacional de Niños, Niñas y Mujeres - Encuesta de Indicadores Múltiples por Conglomerados 2015, Informe Final. Ciudad de México: Instituto Nacional de Salud Pública y UNICEF México; 2016. Available from: <https://goo.gl/W5wHN3>.
7. UNICEF (United Nations Children's Fund), MIDES (Ministerio de Desarrollo Social). Uruguay. Encuesta de Indicadores Múltiples por Conglomerados 2013: informe final. Montevideo: UNICEF, MIDES; 2015. Available from: <https://goo.gl/wNbp4z>.

## **RHS**

1. Centro Paraguayo de Estudios de Población, Agencia del Gobierno de los Estados Unidos para el Desarrollo Internacional. Paraguay. Encuesta Nacional de Demografía y Salud Sexual y Reproductiva 2008 ENDSSR 2008: Informe Final. Asunción: CEPEP; 2009. Available from: [http://www.cepep.org.py/archivos/ENDSSR%202008\\_1.pdf](http://www.cepep.org.py/archivos/ENDSSR%202008_1.pdf).
2. Ministerio de Salud Pública, Centro de Estudios de Población y Desarrollo Social, Instituto Nacional de Estadística y Censos. Ecuador: Encuesta Demográfica y de Salud Materna e Infantil - ENDEMAIN 2004. Quito: CEPAR; 2005. Available from: <https://www.measureevaluation.org/resources/publications/tr-05-30-es>.
3. Republica de Nicaragua, Instituto Nacional de Información de Desarrollo, Ministerio de Salud. Nicaragua. Encuesta Nicaragüense de Demografía y Salud ENDESA 2006/07: Informe Final. Managua: INIDE; 2008. Available from: [http://www.inide.gob.ni/endesa/Endesa\\_2006/InformeFinal06\\_07.pdf](http://www.inide.gob.ni/endesa/Endesa_2006/InformeFinal06_07.pdf).

Table S1 - Percentage of missing data for countries included in the analyses.

| Country           | year | CPMO | ANC4 | SBA  | DPTV |
|-------------------|------|------|------|------|------|
| <b>Belize</b>     | 2011 | 8.1  | 11.4 | 0.0  | 3.6  |
| <b>Bolivia</b>    | 2008 | 0.0  | 0.3  | 0.2  | 1.0  |
| <b>Brazil</b>     | 2006 | 7.8  | 4.1  | 0.3  | NA   |
| <b>Colombia</b>   | 2010 | 0.0  | 1.2  | 0.0  | 1.3  |
| <b>Costa Rica</b> | 2011 | 4.7  | 1.3  | 0.0  | 0.2  |
| <b>Ecuador</b>    | 2004 | 0.0  | 0.3  | 0.6  | 6.2  |
| <b>Guatemala</b>  | 2014 | 0.0  | 0.1  | <0.1 | <0.1 |
| <b>Guyana</b>     | 2014 | 8.5  | 7.2  | 0.6  | 2.3  |
| <b>Honduras</b>   | 2011 | 0.0  | 0.1  | 0.0  | 0.7  |
| <b>Mexico</b>     | 2015 | 4.4  | 0.1  | <0.1 | 0.6  |
| <b>Nicaragua</b>  | 2006 | 0.0  | 0.6  | 0.0  | 7.8  |
| <b>Panama</b>     | 2013 | 6.8  | 0.6  | <0.1 | 1.1  |
| <b>Paraguay</b>   | 2008 | 3.1  | 0.2  | 2.1  | 0.0  |
| <b>Peru</b>       | 2012 | 0.0  | 0.1  | 0.0  | 2.8  |
| <b>Suriname</b>   | 2010 | 6.2  | 26.3 | 1.1  | 4.9  |
| <b>Uruguay</b>    | 2012 | NA   | 5.5  | 0.0  | NA   |

CPMO: modern contraception; ANC4: Antenatal care (four or more visits); SBA: skilled birth attendant; DPTV: DPT vaccine.



## Panel - Ethnic groups in Suriname and Guyana

In contrast to the predominantly Spanish and Portuguese colonization in the 14 countries included in the present analyses, Guyana and Suriname were colonized by the British and Dutch, respectively, and as a result show different ethnic mixes. In both countries, it was possible to identify indigenous and afrodescendants women and children, but the reference group representing the rest of the population differed from those in the rest of the region.

In Suriname, the MICS questionnaire included eight options, with the respective proportions of women aged 15-49 years in the sample: Indian (30.1%), Javanese (14.1%), mixed race (10.1%), indigenous/Amerindians (4.0%), creole (17.2%), maroon (24.5%). Women who reported being (East) Indian, Javanese or of mixed race constituted the reference category.

The afrodescendants in Suriname consist out of two separate groups: maroon and creole. Where creoles are descendants from plantation slaves, and maroons, descendants from runaway slaves who formed independent settlements in the hinterland far from the cities.

At present creoles adapted western styles and live in urban areas and maroons live like the indigenous in their traditional way.<sup>1</sup> In the 1990s, political disturbances caused many maroons to move from their natural living areas to periurban slums.<sup>2-4</sup> These displaced maroon groups are socio-economically disadvantaged. Maroon women have high fertility rates, and reportedly benefit from delivering children across the border in the French Guiana where health care is free and child support is available; this may explain their low use of contraceptives. The table below shows coverage levels and 95% confidence intervals for maroon and creole women and children with the four interventions studied:

| <b>Intervention</b>               | <b>Maroon</b>       | <b>Creole</b>       |
|-----------------------------------|---------------------|---------------------|
| <b>Modern contraceptives</b>      | 27.3% (23.8 - 31.1) | 42.7% (37.1 - 48.5) |
| <b>Antenatal care</b>             | 58.7% (54.1 - 63.1) | 70.0% (58.5 - 77.9) |
| <b>Skilled attendant at birth</b> | 88.1% (85.5 - 90.2) | 97.1% (90.5 - 99.1) |
| <b>DPT3 vaccine</b>               | 61.9% (55.7 - 67.7) | 52.0% (36.7 - 66.9) |

Health services in the hinterland of Suriname are available through the medical mission, a government subsidized NGO established by missionaries which now serves tens of clinics. These provide primary health care staffed with health workers under the supervision of a physician through radio and monthly visits. This may explain the higher vaccine coverage among indigenous and maroon children than for the reference group.

In Guyana, four ethnic categories were recorded in the MICS questionnaire: East Indians (45.7%), mixed race (17.3%), Amerindians (6.8%) and African (30.2%). Guyana also has small numbers of Portuguese and Chinese descendants, who jointly account for about 3% of the population according to the most recent census. In the MICS database, these groups were included in the category of missing/ does not know/ other women, and were not included in the present analyses.<sup>5</sup>

## References

1. Helman A. Cultureel mozaïek van Suriname. Zutphen: Walburg Pers; 1977.
2. Franszoon. The Suriname Maroons Crisis. 1988. [Available from: <https://www.culturalsurvival.org/publications/cultural-survival-quarterly/suriname-maroon-crisis>].
3. Price R. Maroons in Suriname and Guyana: how many and where. *New West Indian Guide* 2002; **76**(1/2): 81-8.
4. Price R. The Maroon population explosion: Suriname and Guyana. *New West Indian Guide* 2013; **76**(3/4): 323-27.
5. Government of Guyana Agency. Compendium 2: population composition. 2017. [Available from: <http://www.statisticsguyana.gov.gy/census.html#comp>].

Table S2 - Intervention coverage and sample size by ethnic group for countries included in the analyses.

| Country/year      | Ethnic group     | Coverage |        |      |        |       |        |      |          |
|-------------------|------------------|----------|--------|------|--------|-------|--------|------|----------|
|                   |                  | CPMO     | Number | ANC4 | Number | SBA   | Number | DPTV | Children |
| <b>Belize</b>     | Reference        | 54.3     | 1,423  | 87.2 | 416    | 96.5  | 416    | 74.6 | 234      |
| <b>2011</b>       | Indigenous       | 36.0     | 358    | 68.5 | 126    | 92.0  | 126    | 73.1 | 75       |
|                   | Afrodescendants  | 52.6     | 573    | 80.0 | 152    | 97.6  | 152    | 77.9 | 85       |
| <b>Brazil</b>     | Reference        | 76.6     | 3,909  | 92.6 | 937    | 98.3  | 990    | 0.0  | 0        |
| <b>2006</b>       | Indigenous       | 72.5     | 205    | 82.9 | 62     | 91.4  | 70     | 0.0  | 0        |
|                   | Afrodescendants  | 75.1     | 5,532  | 89.3 | 1,578  | 96.6  | 1,728  | 0.0  | 0        |
| <b>Bolivia</b>    | Reference        | 46.3     | 4,421  | 83.7 | 1,940  | 90.8  | 2,159  | 88.5 | 688      |
| <b>2008</b>       | Indigenous       | 26.5     | 5,757  | 64.7 | 2,684  | 62.9  | 3,062  | 84.5 | 993      |
|                   | Afrodescendants  | 0.0      | 0      | 0.0  | 0      | 0.0   | 0      | 0.0  | 0        |
| <b>Colombia</b>   | Reference        | 73.9     | 21,525 | 89.0 | 7,031  | 97.2  | 7,557  | 91.5 | 2,450    |
| <b>2010</b>       | Indigenous       | 61.4     | 2,952  | 72.4 | 1,444  | 73.2  | 1,615  | 87.6 | 546      |
|                   | Afrodescendants  | 68.5     | 2,855  | 84.7 | 1,214  | 91.2  | 1,329  | 85.3 | 438      |
| <b>Costa Rica</b> | Reference        | 75.6     | 2,402  | 91.7 | 672    | 99.1  | 672    | 94.9 | 364      |
| <b>2011</b>       | Indigenous       | 66.7     | 155    | 56.0 | 50     | 90.2  | 50     | 88.2 | 27       |
|                   | Afrodescendants  | 66.5     | 116    | 96.4 | 37     | 100.0 | 37     | 91.2 | 20       |
| <b>Ecuador</b>    | Reference        | 61.3     | 4,700  | 68.6 | 1,935  | 74.8  | 2,231  | 77.2 | 727      |
| <b>2004</b>       | Indigenous       | 24.3     | 526    | 27.2 | 316    | 25.3  | 403    | 65.9 | 123      |
|                   | Afro-descendants | 57.4     | 187    | 65.1 | 104    | 68.5  | 129    | 73.8 | 41       |
| <b>Guatemala</b>  | Reference        | 57.7     | 9,062  | 87.3 | 3,849  | 84.1  | 4,199  | 87.6 | 1,329    |
| <b>2014</b>       | Indigenous       | 35.9     | 5,903  | 84.2 | 2,877  | 49.7  | 3,251  | 81.5 | 1,072    |
|                   | Afrodescendants  | 0.0      | 0      | 0.0  | 0      | 0.0   | 0      | 0.0  | 0        |
| <b>Guyana</b>     | Reference        | 34.4     | 2,164  | 88.9 | 655    | 96.7  | 655    | 92.7 | 352      |
| <b>2014</b>       | Indigenous       | 31.2     | 571    | 77.1 | 272    | 61.7  | 272    | 88.2 | 144      |
|                   | Afrodescendants  | 29.1     | 1,009  | 87.2 | 326    | 99.0  | 326    | 91.8 | 174      |
| <b>Honduras</b>   | Reference        | 64.0     | 10,485 | 88.2 | 4,845  | 84.9  | 5,255  | 95.8 | 1,786    |
| <b>2011</b>       | Indigenous       | 61.2     | 1,904  | 87.0 | 990    | 78.4  | 1,085  | 95.3 | 365      |
|                   | Afrodescendants  | 68.4     | 348    | 94.2 | 163    | 89.6  | 184    | 97.6 | 59       |
| <b>Mexico</b>     | Reference        | 64.7     | 6,624  | 95.3 | 2,543  | 98.6  | 2,543  | 72.0 | 152      |
| <b>2015</b>       | Indigenous       | 57.3     | 768    | 81.6 | 297    | 87.9  | 297    | 77.1 | 1,279    |
|                   | Afro-descendants | 0.0      | 0      | 0.0  | 0      | 0.0   | 0      | 0.0  | 0        |
| <b>Nicaragua</b>  | Reference        | 69.3     | 8,481  | 80.9 | 3,509  | 77.9  | 3,792  | 96.4 | 1,281    |
| <b>2006</b>       | Indigenous       | 57.1     | 367    | 57.2 | 221    | 52.6  | 248    | 80.3 | 76       |
|                   | Afrodescendants  | 0.0      | 0      | 0.0  | 0      | 0.0   | 0      | 0.0  | 0        |
| <b>Panama</b>     | Reference        | 64.5     | 3,170  | 92.7 | 1,017  | 98.3  | 1,017  | 86.0 | 577      |
| <b>2013</b>       | Indigenous       | 29.2     | 2,072  | 69.2 | 950    | 66.5  | 950    | 72.6 | 544      |
|                   | Afrodescendants  | 64.2     | 873    | 94.5 | 311    | 99.1  | 311    | 73.9 | 188      |
| <b>Paraguay</b>   | Reference        | 71.2     | 2,269  | 96.8 | 889    | 92.6  | 958    | 77.8 | 311      |
| <b>2008</b>       | Indigenous       | 65.7     | 1,480  | 86.0 | 681    | 76.8  | 762    | 66.9 | 226      |
|                   | Afrodescendants  | 0.0      | 0      | 0.0  | 0      | 0.0   | 0      | 0.0  | 0        |
| <b>Peru</b>       | Reference        | 53.2     | 12,488 | 94.7 | 4,656  | 90.5  | 4,964  | 83.9 | 1,634    |

|                 |                 |      |       |      |     |       |     |      |     |
|-----------------|-----------------|------|-------|------|-----|-------|-----|------|-----|
| <b>2012</b>     | Indigenous      | 36.5 | 1,739 | 89.3 | 674 | 68.0  | 741 | 81.9 | 257 |
|                 | Afrodescendants | 0.0  | 0     | 0.0  | 0   | 0.0   | 0   | 0.0  | 0   |
| <b>Suriname</b> | Reference       | 54.4 | 1,925 | 74.7 | 371 | 96.2  | 371 | 51.4 | 209 |
| <b>2010</b>     | Indigenous      | 43.8 | 259   | 73.6 | 78  | 90.9  | 78  | 76.8 | 53  |
|                 | Afrodescendants | 34.0 | 1,216 | 61.1 | 800 | 90.2  | 800 | 59.9 | 434 |
| <b>Uruguay</b>  | Reference       | 0.0  | 0     | 88.1 | 328 | 99.6  | 328 | 0.0  | 0   |
| <b>2012</b>     | Indigenous      | 0.0  | 0     | 12.1 | 17  | 100.0 | 17  | 0.0  | 0   |
|                 | Afrodescendants | 0.0  | 0     | 78.0 | 43  | 95.6  | 43  | 0.0  | 0   |

CPMO: modern contraception; ANC4: Antenatal care (four or more visits); SBA: skilled birth attendant; DPTV: DPT vaccine.

Figure S2 - Distribution of reference, afrodescendants and indigenous groups according to women's education, by country.

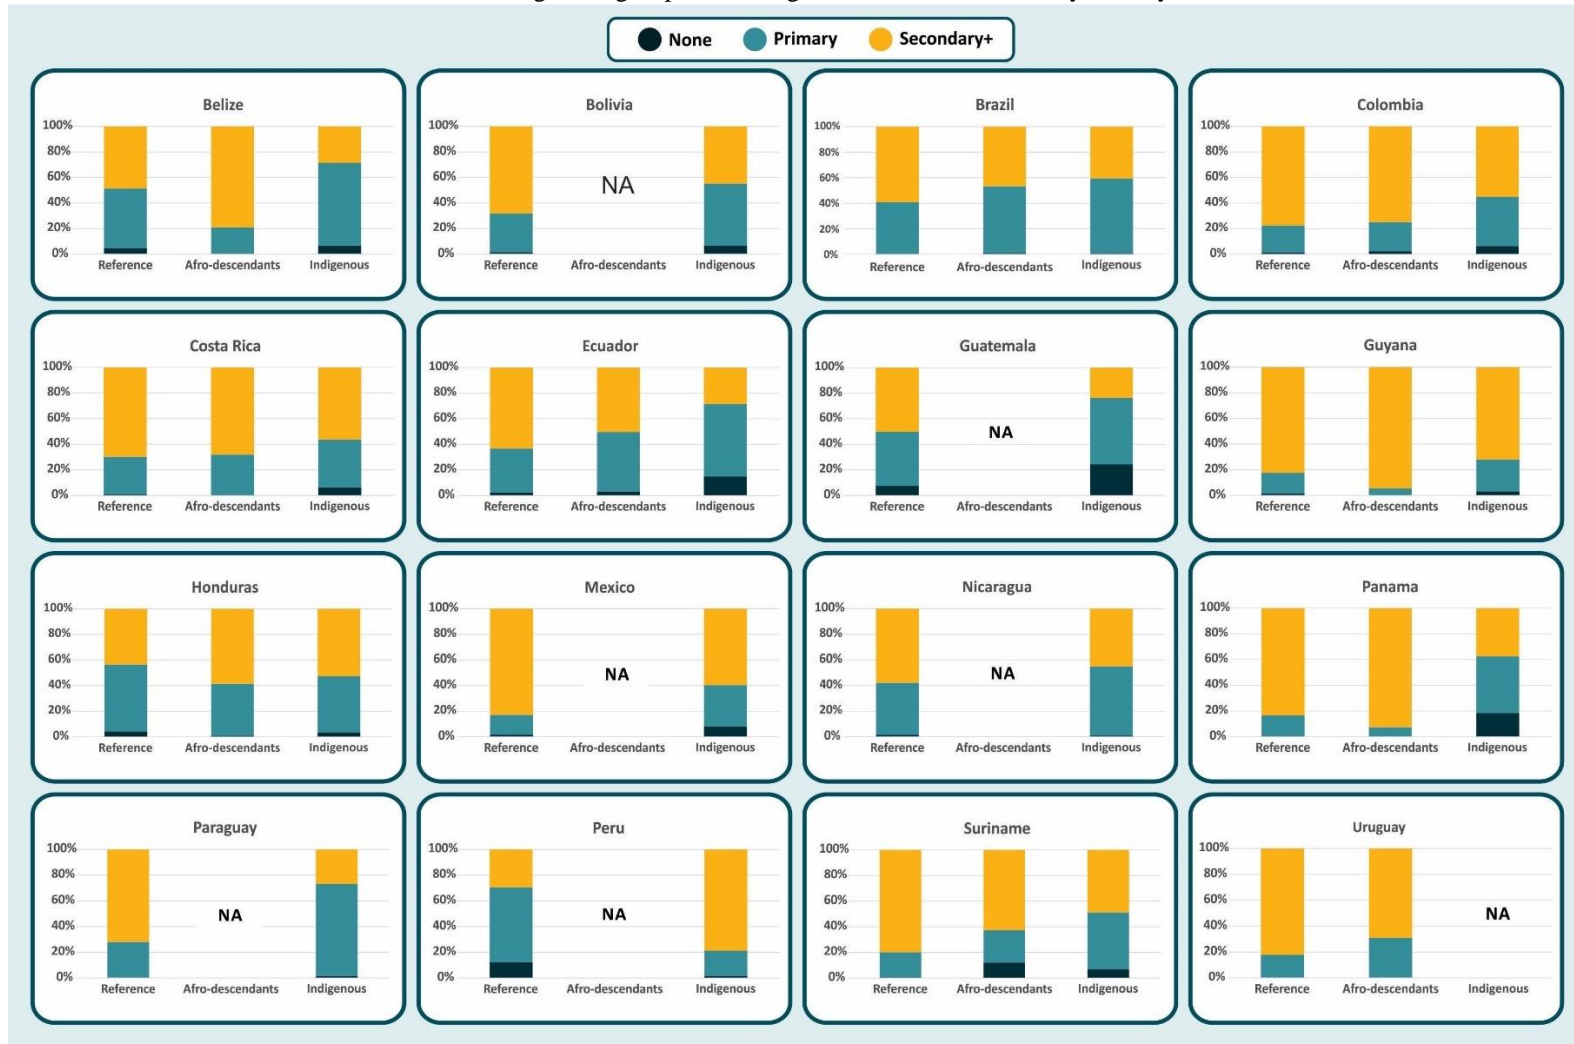

Figure S3 - Distribution of reference, afrodescendants and indigenous groups according to area of residence, by country.

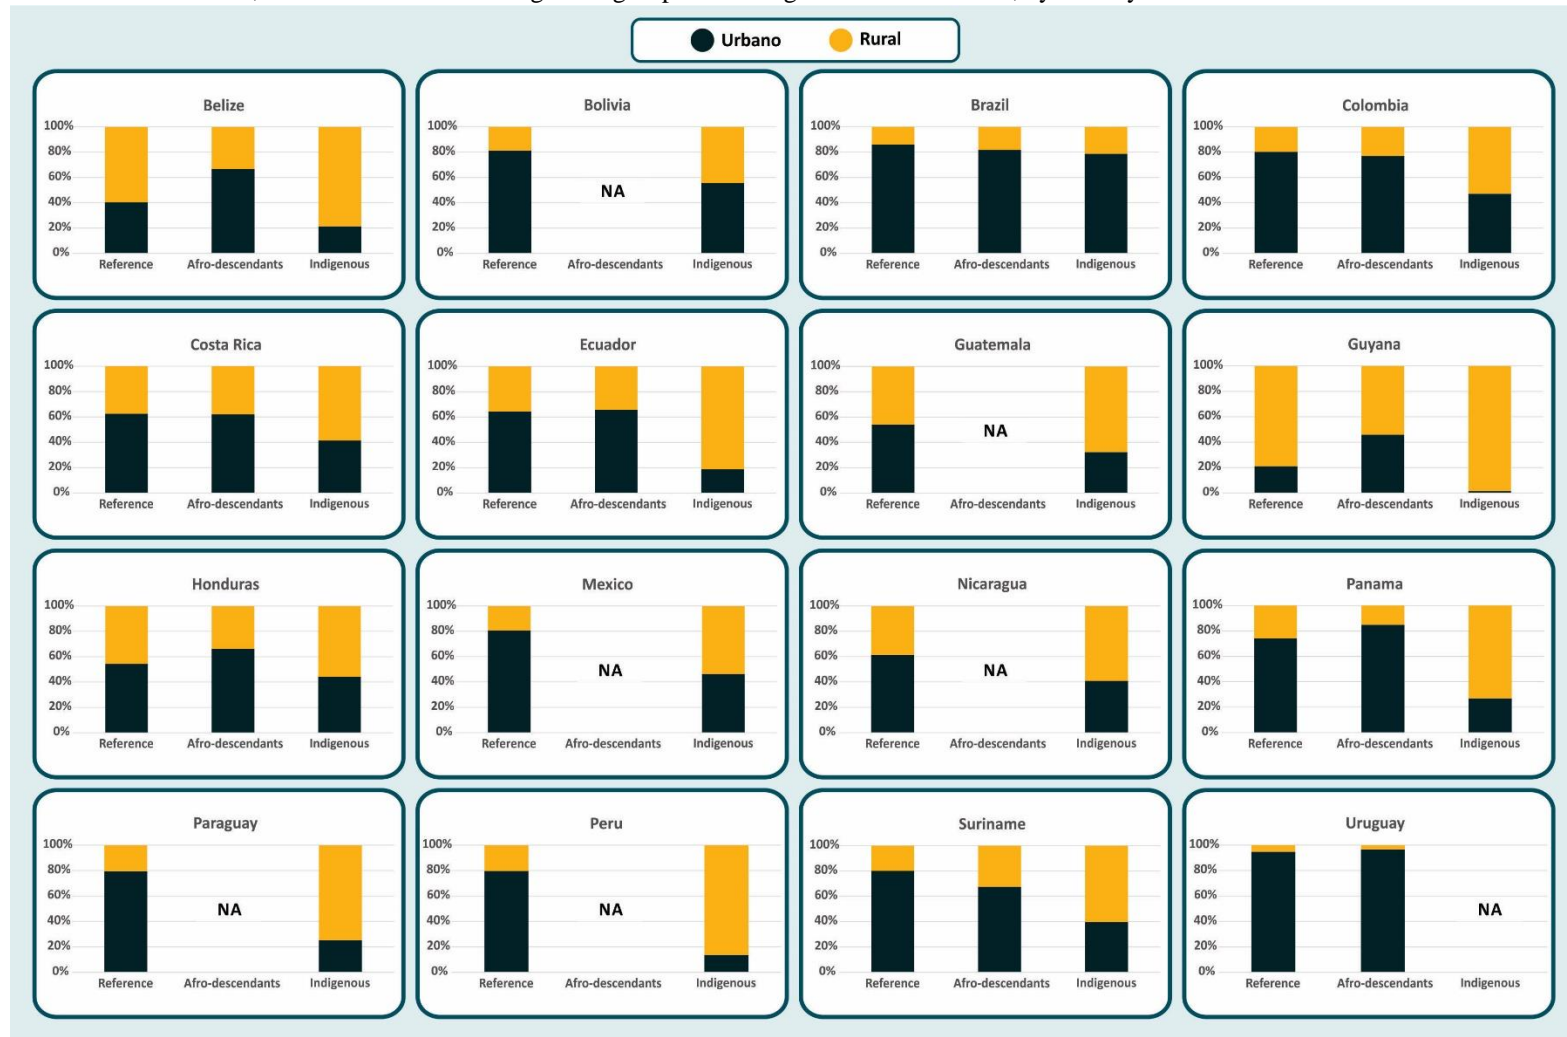

Table S3 - Distribution of women aged 15-49 years in each ethnic group according to wealth, schooling and urban-rural residence.

| Country/year      | Ethnic group    | Total% | Wealth quintiles |      |      |      |         | Education |      |         |            | Residence |       |       |         |
|-------------------|-----------------|--------|------------------|------|------|------|---------|-----------|------|---------|------------|-----------|-------|-------|---------|
|                   |                 |        | Poorest          | 2nd  | 3rd  | 4th  | Richest | P level   | None | Primary | Secondary+ | P level   | Urban | Rural | P level |
| <b>Belize</b>     | Reference       | 59.1   | 14.8             | 22.1 | 21.2 | 20.5 | 21.4    | <0.001    | 4.9  | 46.5    | 48.6       | <0.001    | 40.4  | 59.6  | <0.001  |
| <b>2011</b>       | Indigenous      | 10.1   | 52.4             | 20.8 | 14.1 | 9.9  | 2.8     |           | 6.7  | 64.8    | 28.5       |           | 21.4  | 78.6  |         |
|                   | Afrodescendants | 30.8   | 6.0              | 15.7 | 24.5 | 25.0 | 28.8    |           | 0.5  | 20.5    | 79.0       |           | 66.8  | 33.2  |         |
| <b>Brazil</b>     | Reference       | 41.6   | 13.0             | 15.6 | 18.2 | 22.9 | 30.3    | <0.001    | 0.3  | 40.4    | 59.3       | <0.001    | 86.0  | 14.0  | <0.001  |
| <b>2006</b>       | Indigenous      | 2.0    | 26.8             | 20.6 | 17.8 | 19.7 | 15.1    |           | 0.6  | 58.8    | 40.6       |           | 78.7  | 21.3  |         |
|                   | Afrodescendants | 56.4   | 24.6             | 22.8 | 21.1 | 17.8 | 13.7    |           | 0.8  | 52.6    | 46.8       |           | 81.7  | 18.3  |         |
| <b>Bolivia</b>    | Reference       | 40.4   | 6.3              | 12.1 | 19.0 | 26.5 | 36.1    | <0.001    | 1.6  | 30.2    | 68.2       | <0.001    | 81.2  | 18.8  | <0.001  |
| <b>2008</b>       | Indigenous      | 59.6   | 21.7             | 20.7 | 21.7 | 19.9 | 16.0    |           | 6.6  | 48.6    | 44.8       |           | 55.6  | 44.4  |         |
|                   | Afrodescendants | NA     | NA               | NA   | NA   | NA   | NA      |           | NA   | NA      | NA         |           | NA    | NA    |         |
| <b>Colombia</b>   | Reference       | 85.7   | 13.9             | 19.1 | 22.1 | 22.8 | 22.1    | <0.001    | 1.3  | 21      | 77.7       | <0.001    | 80.2  | 19.8  | <0.001  |
| <b>2010</b>       | Indigenous      | 3.9    | 50.9             | 19.5 | 15.2 | 8.7  | 5.7     |           | 6.4  | 38.5    | 55.1       |           | 47.1  | 52.9  |         |
|                   | Afrodescendants | 10.4   | 26.8             | 23.3 | 19.5 | 17.7 | 12.7    |           | 2.3  | 22.9    | 74.8       |           | 76.9  | 23.1  |         |
| <b>Costa Rica</b> | Reference       | 92.9   | 16.2             | 19.2 | 20.6 | 21.6 | 22.4    | <0.001    | 0.9  | 29.4    | 69.7       | <0.001    | 62.5  | 37.5  | <0.001  |
| <b>2011</b>       | Indigenous      | 4.7    | 39.4             | 16.6 | 11.7 | 13.6 | 18.7    |           | 6.4  | 37.1    | 56.5       |           | 41.5  | 58.5  |         |
|                   | Afrodescendants | 2.4    | 15.6             | 27.0 | 24.3 | 16.1 | 17.0    |           | 0.3  | 31.6    | 68.1       |           | 62.1  | 37.9  |         |
| <b>Ecuador</b>    | Reference       | 89.4   | 13.3             | 18.4 | 20.8 | 21.5 | 26.0    | <0.001    | 2.4  | 34.4    | 63.2       | <0.001    | 64.3  | 35.7  | <0.001  |
| <b>2004</b>       | Indigenous      | 7.5    | 51.7             | 24.4 | 12.8 | 7.8  | 3.3     |           | 15.0 | 56.5    | 28.5       |           | 18.8  | 81.7  |         |
|                   | Afrodescendants | 3.1    | 17.5             | 27.0 | 22.2 | 17.0 | 16.3    |           | 3.2  | 46.5    | 50.3       |           | 65.7  | 34.3  |         |
| <b>Guatemala</b>  | Reference       | 60.1   | 8.3              | 13.7 | 19.4 | 26.7 | 31.9    | <0.001    | 7.6  | 42.2    | 50.2       | <0.001    | 53.9  | 46.1  | <0.001  |
| <b>2014</b>       | Indigenous      | 39.9   | 31.0             | 26.3 | 20.7 | 14.6 | 7.4     |           | 24.3 | 52.0    | 23.7       |           | 32.3  | 67.7  |         |
|                   | Afrodescendants | NA     | NA               | NA   | NA   | NA   | NA      |           | NA   | NA      | NA         |           | NA    | NA    |         |
| <b>Guyana</b>     | Reference       | 63.1   | 11.9             | 19.1 | 21.2 | 23.0 | 24.8    | <0.001    | 1.5  | 16.1    | 82.4       | <0.001    | 21.1  | 78.9  | <0.001  |
| <b>2014</b>       | Indigenous      | 6.8    | 79.5             | 9.9  | 5.5  | 3.8  | 1.3     |           | 3.2  | 24.8    | 72.0       |           | 1.6   | 98.4  |         |
|                   | Afrodescendants | 30.1   | 13.7             | 18.9 | 20.1 | 25.1 | 22.2    |           | 0.0  | 5.5     | 94.5       |           | 45.8  | 54.2  |         |

|                  |                 |      |      |      |      |      |      |        |      |      |      |        |      |      |        |
|------------------|-----------------|------|------|------|------|------|------|--------|------|------|------|--------|------|------|--------|
| <b>Honduras</b>  | Reference       | 87.0 | 15.3 | 17.9 | 21.5 | 23.4 | 21.9 | <0.001 | 4.2  | 52.3 | 43.5 | <0.001 | 54.4 | 45.6 | <0.001 |
| <b>2011</b>      | Indigenous      | 10.5 | 26.6 | 21.8 | 16.8 | 15.2 | 19.6 |        | 3.6  | 43.6 | 52.8 |        | 44.3 | 55.7 |        |
|                  | Afrodescendants | 2.5  | 7.5  | 12.5 | 22.2 | 27.2 | 30.6 |        | 0.8  | 40.6 | 58.6 |        | 66.2 | 33.8 |        |
| <b>Mexico</b>    | Reference       | 92.5 | 14.7 | 20.9 | 21.8 | 21.1 | 21.5 | <0.001 | 1.5  | 15.6 | 82.9 | <0.001 | 80.6 | 19.4 | <0.001 |
| <b>2015</b>      | Indigenous      | 7.5  | 66.9 | 14.5 | 11.0 | 4.7  | 2.9  |        | 7.9  | 32.5 | 59.6 |        | 46.2 | 53.8 |        |
|                  | Afrodescendants | NA   | NA   | NA   | NA   | NA   | NA   |        | NA   | NA   | NA   |        | NA   | NA   |        |
| <b>Nicaragua</b> | Reference       | 95.6 | 17.4 | 19.0 | 20.1 | 22.1 | 21.4 | <0.001 | 1.4  | 40.8 | 57.8 | <0.001 | 61.2 | 38.8 | <0.001 |
| <b>2006</b>      | Indigenous      | 4.4  | 45.4 | 18.6 | 19.3 | 12.9 | 3.8  |        | 1.0  | 53.9 | 45.1 |        | 40.9 | 59.1 |        |
|                  | Afrodescendants | NA   | NA   | NA   | NA   | NA   | NA   |        | NA   | NA   | NA   |        | NA   | NA   |        |
| <b>Panama</b>    | Reference       | 71.8 | 10.7 | 19.9 | 22.5 | 22.1 | 24.8 | <0.001 | 0.3  | 16.3 | 83.4 | <0.001 | 74.2 | 25.8 | <0.001 |
| <b>2013</b>      | Indigenous      | 10.9 | 76.7 | 16.0 | 5.8  | 1.2  | 0.3  |        | 18.5 | 44.1 | 37.4 |        | 26.8 | 73.2 |        |
|                  | Afrodescendants | 17.3 | 6.2  | 16.1 | 20.0 | 31.8 | 25.9 |        | 0.2  | 7.2  | 92.6 |        | 84.8 | 15.2 |        |
| <b>Paraguay</b>  | Reference       | 21.2 | 7.7  | 16.5 | 22.3 | 25.7 | 27.8 | <0.001 | 0.1  | 28.0 | 71.9 | <0.001 | 79.5 | 20.5 | <0.001 |
| <b>2008</b>      | Indigenous      | 71.8 | 51.2 | 28.5 | 13.8 | 4.3  | 2.2  |        | 1.6  | 71.6 | 26.8 |        | 25.3 | 74.7 |        |
|                  | Afrodescendants | NA   | NA   | NA   | NA   | NA   | NA   |        | NA   | NA   | NA   |        | NA   | NA   |        |
| <b>Peru</b>      | Reference       | 92.6 | 11.5 | 17.9 | 23.0 | 23.7 | 23.9 | <0.001 | 12.2 | 58.4 | 29.4 | <0.001 | 79.7 | 20.3 | <0.001 |
| <b>2012</b>      | Indigenous      | 7.4  | 63   | 30.9 | 4.8  | 1.3  | 0.0  |        | 1.7  | 19.6 | 78.7 |        | 13.6 | 86.4 |        |
|                  | Afrodescendants | NA   | NA   | NA   | NA   | NA   | NA   |        | NA   | NA   | NA   |        | NA   | NA   |        |
| <b>Suriname</b>  | Reference       | 54.3 | 5.2  | 19.0 | 22.1 | 26.2 | 27.5 | <0.001 | 0.5  | 19.7 | 79.8 | <0.001 | 80.0 | 20.0 | <0.001 |
| <b>2010</b>      | Indigenous      | 4.0  | 47.8 | 18.3 | 17.9 | 8.1  | 7.9  |        | 6.9  | 44.4 | 48.7 |        | 39.7 | 60.3 |        |
|                  | Afrodescendants | 41.7 | 32.0 | 20.6 | 17.7 | 15.5 | 14.2 |        | 12.1 | 25.3 | 62.6 |        | 67.5 | 32.5 |        |
| <b>Uruguay</b>   | Reference       | 88.0 | 16.1 | 17.0 | 19.7 | 26.0 | 21.2 | <0.001 | 0.0  | 17.8 | 82.2 | 0.228  | 94.7 | 5.3  | 0.098  |
| <b>2012</b>      | Indigenous      | 4.9  | 11.3 | 70.7 | 6.2  | 6.3  | 5.5  |        | 0.0  | 37.7 | 62.3 |        | 98.7 | 1.3  |        |
|                  | Afrodescendants | 7.1  | 42.8 | 30.7 | 13.9 | 9.5  | 3.1  |        | 0.0  | 30.9 | 69.1 |        | 96.7 | 3.3  |        |

NA: not available.



Table S4 - Crude and adjusted coverage ratios (95%CI) for modern contraceptive use in indigenous women, compared to the reference category, by country.

| Country/year      | Crude CR    | Adjusted for |             |             |                 |
|-------------------|-------------|--------------|-------------|-------------|-----------------|
|                   |             | Wealth       | Area        | Education   | All stratifiers |
| <b>Belize</b>     | 0.66        | 0.72         | 0.68        | 0.65        | 0.69            |
| <b>2011</b>       | 0.56 - 0.78 | 0.60 - 0.86  | 0.57 - 0.80 | 0.55 - 0.77 | 0.57 - 0.82     |
| <b>Bolivia</b>    | 0.57        | 0.64         | 0.62        | 0.62        | 0.65            |
| <b>2008</b>       | 0.54 - 0.61 | 0.60 - 0.68  | 0.58 - 0.66 | 0.58 - 0.66 | 0.61 - 0.70     |
| <b>Brazil</b>     | 0.95        | 0.96         | 0.95        | 0.94        | 0.95            |
| <b>2006</b>       | 0.83 - 1.09 | 0.84 - 1.10  | 0.83 - 1.08 | 0.81 - 1.08 | 0.82 - 1.10     |
| <b>Colombia</b>   | 0.83        | 0.85         | 0.83        | 0.84        | 0.85            |
| <b>2010</b>       | 0.79 - 0.87 | 0.81 - 0.89  | 0.79 - 0.87 | 0.80 - 0.88 | 0.81 - 0.90     |
| <b>Costa Rica</b> | 0.88        | 0.91         | 0.89        | 0.89        | 0.92            |
| <b>2011</b>       | 0.72 - 1.09 | 0.75 - 1.11  | 0.72 - 1.10 | 0.73 - 1.10 | 0.76 - 1.12     |
| <b>Ecuador</b>    | 0.40        | 0.44         | 0.42        | 0.43        | 0.46            |
| <b>2004</b>       | 0.33 - 0.48 | 0.37 - 0.53  | 0.35 - 0.51 | 0.35 - 0.51 | 0.38 - 0.55     |
| <b>Guatemala</b>  | 0.62        | 0.71         | 0.65        | 0.66        | 0.72            |
| <b>2014</b>       | 0.60 - 0.65 | 0.68 - 0.75  | 0.62 - 0.68 | 0.63 - 0.69 | 0.68 - 0.75     |
| <b>Guyana</b>     | 0.91        | 0.97         | 0.90        | 0.92        | 0.95            |
| <b>2014</b>       | 0.77 - 1.07 | 0.78 - 1.19  | 0.76 - 1.07 | 0.77 - 1.09 | 0.77 - 1.18     |
| <b>Honduras</b>   | 0.96        | 0.98         | 0.97        | 0.95        | 0.98            |
| <b>2011</b>       | 0.91 - 1.00 | 0.93 - 1.03  | 0.92 - 1.01 | 0.91 - 1.00 | 0.93 - 1.03     |
| <b>Mexico</b>     | 0.88        | 0.94         | 0.90        | 0.89        | 0.94            |
| <b>2015</b>       | 0.79 - 0.99 | 0.84 - 1.05  | 0.80 - 1.00 | 0.79 - 0.99 | 0.84 - 1.05     |
| <b>Nicaragua</b>  | 0.82        | 0.86         | 0.83        | 0.82        | 0.84            |
| <b>2006</b>       | 0.74 - 0.91 | 0.77 - 0.95  | 0.75 - 0.93 | 0.73 - 0.92 | 0.75 - 0.95     |
| <b>Panama</b>     | 0.45        | 0.47         | 0.44        | 0.49        | 0.49            |
| <b>2013</b>       | 0.40 - 0.52 | 0.40 - 0.55  | 0.38 - 0.51 | 0.42 - 0.57 | 0.41 - 0.58     |
| <b>Paraguay</b>   | 0.92        | 0.92         | 0.91        | 0.95        | 0.93            |
| <b>2008</b>       | 0.88 - 0.97 | 0.86 - 0.98  | 0.86 - 0.97 | 0.89 - 1.01 | 0.87 - 1.00     |
| <b>Peru</b>       | 0.69        | 0.76         | 0.75        | 0.74        | 0.79            |
| <b>2012</b>       | 0.64 - 0.74 | 0.71 - 0.83  | 0.69 - 0.81 | 0.69 - 0.80 | 0.73 - 0.85     |
| <b>Suriname</b>   | 0.81        | 0.87         | 0.80        | 0.86        | 0.90            |
| <b>2010</b>       | 0.68 - 0.96 | 0.71 - 1.06  | 0.67 - 0.95 | 0.72 - 1.03 | 0.73 - 1.10     |

Table S5 - Crude and adjusted coverage ratios (95%CI) for antenatal care (four or more visits) in indigenous women, compared to the reference category, by country.

| Country/year      | Crude CR    | Adjusted for |             |             |                 |
|-------------------|-------------|--------------|-------------|-------------|-----------------|
|                   |             | Wealth       | Area        | Education   | All stratifiers |
| <b>Belize</b>     | 0.79        | 0.84         | 0.79        | 0.78        | 0.80            |
| <b>2011</b>       | 0.69 - 0.89 | 0.73 - 0.97  | 0.69 - 0.90 | 0.68 - 0.89 | 0.70 - 0.92     |
| <b>Bolivia</b>    | 0.77        | 0.87         | 0.83        | 0.83        | 0.88            |
| <b>2008</b>       | 0.74 - 0.80 | 0.83 - 0.90  | 0.80 - 0.87 | 0.78 - 0.86 | 0.84 - 0.91     |
| <b>Brazil</b>     | 0.89        | 0.91         | 0.90        | 0.89        | 0.91            |
| <b>2006</b>       | 0.75 - 1.07 | 0.77 - 1.08  | 0.75 - 1.07 | 0.76 - 1.05 | 0.76 - 1.07     |
| <b>Colombia</b>   | 0.81        | 0.87         | 0.84        | 0.86        | 0.89            |
| <b>2010</b>       | 0.77 - 0.86 | 0.82 - 0.92  | 0.80 - 0.89 | 0.82 - 0.91 | 0.84 - 0.94     |
| <b>Costa Rica</b> | 0.61        | 0.62         | 0.61        | 0.61        | 0.61            |
| <b>2011</b>       | 0.39 - 0.96 | 0.40 - 0.95  | 0.37 - 0.97 | 0.38 - 0.97 | 0.40 - 0.94     |
| <b>Ecuador</b>    | 0.40        | 0.51         | 0.46        | 0.46        | 0.52            |
| <b>2004</b>       | 0.32 - 0.50 | 0.41 - 0.64  | 0.37 - 0.58 | 0.37 - 0.57 | 0.42 - 0.66     |
| <b>Guatemala</b>  | 0.96        | 1.00         | 0.97        | 0.99        | 1.00            |
| <b>2014</b>       | 0.94 - 0.99 | 0.97 - 1.02  | 0.95 - 0.99 | 0.96 - 1.01 | 0.98 - 1.03     |
| <b>Guyana</b>     | 0.87        | 0.89         | 0.86        | 0.89        | 0.89            |
| <b>2014</b>       | 0.80 - 0.94 | 0.81 - 0.98  | 0.79 - 0.94 | 0.82 - 0.96 | 0.81 - 0.98     |
| <b>Honduras</b>   | 0.99        | 1.00         | 0.99        | 0.98        | 1.00            |
| <b>2011</b>       | 0.96 - 1.02 | 0.98 - 1.03  | 0.96 - 1.02 | 0.95 - 1.01 | 0.97 - 1.02     |
| <b>Mexico</b>     | 0.86        | 0.88         | 0.86        | 0.88        | 0.89            |
| <b>2015</b>       | 0.79 - 0.92 | 0.82 - 0.95  | 0.79 - 0.93 | 0.82 - 0.94 | 0.83 - 0.96     |
| <b>Nicaragua</b>  | 0.71        | 0.78         | 0.74        | 0.76        | 0.81            |
| <b>2006</b>       | 0.62 - 0.81 | 0.69 - 0.89  | 0.64 - 0.84 | 0.66 - 0.88 | 0.71 - 0.92     |
| <b>Panama</b>     | 0.75        | 0.81         | 0.78        | 0.86        | 0.89            |
| <b>2013</b>       | 0.70 - 0.80 | 0.74 - 0.88  | 0.72 - 0.84 | 0.80 - 0.92 | 0.82 - 0.96     |
| <b>Paraguay</b>   | 0.89        | 0.95         | 0.91        | 0.93        | 0.97            |
| <b>2008</b>       | 0.86 - 0.92 | 0.92 - 0.99  | 0.87 - 0.95 | 0.90 - 0.97 | 0.93 - 1.01     |
| <b>Peru</b>       | 0.94        | 0.99         | 0.97        | 0.98        | 1.00            |
| <b>2012</b>       | 0.92 - 0.97 | 0.96 - 1.03  | 0.94 - 1.00 | 0.95 - 1.01 | 0.97 - 1.03     |
| <b>Suriname</b>   | 0.99        | 0.99         | 0.94        | 1.01        | 0.98            |
| <b>2010</b>       | 0.82 - 1.18 | 0.81 - 1.21  | 0.78 - 1.14 | 0.83 - 1.22 | 0.80 - 1.20     |

Table S6 - Crude and adjusted coverage ratios (95%CI) for skilled birth attendant in indigenous women, compared to the reference category, by country.

| Country/year      | Crude CR    | Adjusted for |             |             |                 |
|-------------------|-------------|--------------|-------------|-------------|-----------------|
|                   |             | Wealth       | Area        | Education   | All stratifiers |
| <b>Belize</b>     | 0.95        | 0.99         | 0.95        | 0.96        | 0.98            |
| <b>2011</b>       | 0.91 - 1.00 | 0.94 - 1.04  | 0.91 - 1.00 | 0.91 - 1.01 | 0.93 - 1.04     |
| <b>Bolivia</b>    | 0.69        | 0.82         | 0.79        | 0.76        | 0.84            |
| <b>2008</b>       | 0.67 - 0.72 | 0.80 - 0.85  | 0.77 - 0.82 | 0.74 - 0.79 | 0.81 - 0.86     |
| <b>Brazil</b>     | 0.93        | 0.93         | 0.93        | 0.94        | 0.94            |
| <b>2006</b>       | 0.84 - 1.03 | 0.85 - 1.03  | 0.84 - 1.03 | 0.85 - 1.03 | 0.85 - 1.03     |
| <b>Colombia</b>   | 0.75        | 0.79         | 0.78        | 0.78        | 0.81            |
| <b>2010</b>       | 0.72 - 0.79 | 0.76 - 0.83  | 0.74 - 0.82 | 0.75 - 0.82 | 0.77 - 0.85     |
| <b>Costa Rica</b> | 0.91        | 0.92         | 0.91        | 0.91        | 0.91            |
| <b>2011</b>       | 0.81 - 1.02 | 0.82 - 1.03  | 0.82 - 1.02 | 0.81 - 1.02 | 0.82 - 1.02     |
| <b>Ecuador</b>    | 0.34        | 0.43         | 0.41        | 0.40        | 0.47            |
| <b>2004</b>       | 0.27 - 0.42 | 0.35 - 0.53  | 0.33 - 0.50 | 0.33 - 0.50 | 0.38 - 0.57     |
| <b>Guatemala</b>  | 0.59        | 0.72         | 0.62        | 0.66        | 0.74            |
| <b>2014</b>       | 0.57 - 0.62 | 0.69 - 0.75  | 0.60 - 0.65 | 0.64 - 0.69 | 0.71 - 0.77     |
| <b>Guyana</b>     | 0.63        | 0.67         | 0.64        | 0.64        | 0.68            |
| <b>2014</b>       | 0.56 - 0.71 | 0.60 - 0.75  | 0.57 - 0.72 | 0.57 - 0.72 | 0.61 - 0.76     |
| <b>Honduras</b>   | 0.92        | 0.98         | 0.94        | 0.90        | 0.96            |
| <b>2011</b>       | 0.89 - 0.96 | 0.95 - 1.01  | 0.91 - 0.97 | 0.88 - 0.93 | 0.93 - 1.00     |
| <b>Mexico</b>     | 0.89        | 0.92         | 0.90        | 0.90        | 0.92            |
| <b>2015</b>       | 0.85 - 0.94 | 0.87 - 0.96  | 0.86 - 0.95 | 0.86 - 0.95 | 0.88 - 0.96     |
| <b>Nicaragua</b>  | 0.68        | 0.84         | 0.74        | 0.75        | 0.86            |
| <b>2006</b>       | 0.59 - 0.78 | 0.74 - 0.96  | 0.66 - 0.85 | 0.65 - 0.85 | 0.76 - 0.97     |
| <b>Panama</b>     | 0.68        | 0.76         | 0.72        | 0.79        | 0.83            |
| <b>2013</b>       | 0.63 - 0.72 | 0.71 - 0.81  | 0.68 - 0.77 | 0.74 - 0.84 | 0.78 - 0.88     |
| <b>Paraguay</b>   | 0.83        | 0.88         | 0.85        | 0.87        | 0.90            |
| <b>2008</b>       | 0.79 - 0.88 | 0.83 - 0.93  | 0.80 - 0.90 | 0.82 - 0.93 | 0.84 - 0.95     |
| <b>Peru</b>       | 0.75        | 0.92         | 0.88        | 0.86        | 0.96            |
| <b>2012</b>       | 0.71 - 0.79 | 0.87 - 0.99  | 0.83 - 0.94 | 0.81 - 0.92 | 0.90 - 1.02     |
| <b>Suriname</b>   | 0.95        | 0.98         | 0.95        | 0.95        | 0.98            |
| <b>2010</b>       | 0.88 - 1.01 | 0.92 - 1.05  | 0.90 - 1.02 | 0.89 - 1.01 | 0.92 - 1.04     |

Table S7 - Crude and adjusted coverage ratios (95%CI) for DPT immunization in indigenous children, compared to the reference category, by country.

| Country/year      | Crude CR    | Adjusted for |             |             |                 |
|-------------------|-------------|--------------|-------------|-------------|-----------------|
|                   |             | Wealth       | Area        | Education   | All stratifiers |
| <b>Belize</b>     | 0.98        | 0.94         | 0.97        | 0.98        | 0.94            |
| <b>2011</b>       | 0.83 - 1.16 | 0.79 - 1.13  | 0.81 - 1.14 | 0.83 - 1.15 | 0.79 - 1.13     |
| <b>Bolivia</b>    | 0.95        | 0.95         | 0.94        | 0.97        | 0.95            |
| <b>2008</b>       | 0.91 - 1.00 | 0.90 - 1.00  | 0.89 - 0.99 | 0.92 - 1.02 | 0.90 - 1.00     |
| <b>Brazil</b>     | NA          | NA           | NA          | NA          | NA              |
| <b>2006</b>       | NA          | NA           | NA          | NA          | NA              |
| <b>Colombia</b>   | 0.96        | 0.98         | 0.97        | 0.97        | 0.99            |
| <b>2010</b>       | 0.91 - 1.01 | 0.93 - 1.04  | 0.92 - 1.02 | 0.92 - 1.03 | 0.94 - 1.05     |
| <b>Costa Rica</b> | 0.93        | 0.97         | 0.93        | 0.92        | 0.95            |
| <b>2011</b>       | 0.78 - 1.11 | 0.77 - 1.22  | 0.78 - 1.10 | 0.78 - 1.08 | 0.77 - 1.18     |
| <b>Ecuador</b>    | 0.85        | 0.92         | 0.89        | 0.91        | 0.93            |
| <b>2004</b>       | 0.72 - 1.01 | 0.78 - 1.08  | 0.76 - 1.06 | 0.78 - 1.07 | 0.79 - 1.09     |
| <b>Guatemala</b>  | 0.93        | 0.96         | 0.93        | 0.95        | 0.97            |
| <b>2014</b>       | 0.89 - 0.97 | 0.92 - 1.00  | 0.90 - 0.97 | 0.91 - 0.99 | 0.92 - 1.01     |
| <b>Guyana</b>     | 0.95        | 0.96         | 0.96        | 0.96        | 0.96            |
| <b>2014</b>       | 0.88 - 1.03 | 0.86 - 1.07  | 0.88 - 1.04 | 0.88 - 1.05 | 0.87 - 1.06     |
| <b>Honduras</b>   | 0.99        | 0.99         | 0.99        | 0.99        | 0.99            |
| <b>2011</b>       | 0.96 - 1.03 | 0.96 - 1.02  | 0.96 - 1.02 | 0.96 - 1.02 | 0.96 - 1.02     |
| <b>Mexico</b>     | 1.07        | 1.06         | 1.02        | 1.08        | 1.05            |
| <b>2015</b>       | 0.95 - 1.21 | 0.93 - 1.21  | 0.91 - 1.15 | 0.96 - 1.22 | 0.93 - 1.19     |
| <b>Nicaragua</b>  | 0.83        | 0.87         | 0.85        | 0.84        | 0.86            |
| <b>2006</b>       | 0.72 - 0.97 | 0.75 - 1.01  | 0.73 - 0.99 | 0.70 - 1.01 | 0.72 - 1.02     |
| <b>Panama</b>     | 0.84        | 0.85         | 0.80        | 0.82        | 0.84            |
| <b>2013</b>       | 0.75 - 0.95 | 0.73 - 0.99  | 0.71 - 0.90 | 0.72 - 0.94 | 0.72 - 0.98     |
| <b>Paraguay</b>   | 0.86        | 0.95         | 0.83        | 0.94        | 0.93            |
| <b>2008</b>       | 0.76 - 0.98 | 0.81 - 1.12  | 0.72 - 0.95 | 0.82 - 1.08 | 0.79 - 1.10     |
| <b>Peru</b>       | 0.98        | 0.98         | 0.98        | 0.99        | 0.99            |
| <b>2012</b>       | 0.91 - 1.04 | 0.91 - 1.05  | 0.91 - 1.06 | 0.92 - 1.06 | 0.91 - 1.06     |
| <b>Suriname</b>   | 1.49        | 1.47         | 1.40        | 1.37        | 1.35            |
| <b>2010</b>       | 1.19 - 1.86 | 1.13 - 1.91  | 1.11 - 1.77 | 1.06 - 1.79 | 1.03 - 1.78     |

NA: not available.

Table S8 - Crude and adjusted coverage ratios (95%CI) for modern contraceptive use in afrodescendant women, compared to the reference.

| Country/year      | Crude CR    | Adjusted for |             |             |                 |
|-------------------|-------------|--------------|-------------|-------------|-----------------|
|                   |             | Wealth       | Area        | Education   | All stratifiers |
| <b>Belize</b>     | 0.97        | 0.95         | 0.96        | 0.94        | 0.94            |
| <b>2011</b>       | 0.88 - 1.07 | 0.86 - 1.04  | 0.87 - 1.06 | 0.85 - 1.04 | 0.85 - 1.04     |
| <b>Brazil</b>     | 0.98        | 0.98         | 0.98        | 0.98        | 0.99            |
| <b>2006</b>       | 0.94 - 1.02 | 0.94 - 1.03  | 0.94 - 1.02 | 0.94 - 1.02 | 0.94 - 1.03     |
| <b>Colombia</b>   | 0.93        | 0.93         | 0.93        | 0.93        | 0.94            |
| <b>2010</b>       | 0.90 - 0.96 | 0.90 - 0.96  | 0.90 - 0.96 | 0.90 - 0.96 | 0.91 - 0.97     |
| <b>Costa Rica</b> | 0.88        | 0.88         | 0.88        | 0.88        | 0.88            |
| <b>2011</b>       | 0.67 - 1.15 | 0.68 - 1.15  | 0.67 - 1.15 | 0.67 - 1.15 | 0.68 - 1.15     |
| <b>Ecuador</b>    | 0.94        | 0.96         | 0.93        | 0.94        | 0.95            |
| <b>2004</b>       | 0.81 - 1.09 | 0.83 - 1.12  | 0.80 - 1.09 | 0.81 - 1.10 | 0.82 - 1.11     |
| <b>Guyana</b>     | 0.85        | 0.84         | 0.85        | 0.84        | 0.84            |
| <b>2014</b>       | 0.73 - 0.98 | 0.73 - 0.98  | 0.73 - 0.99 | 0.72 - 0.97 | 0.72 - 0.98     |
| <b>Honduras</b>   | 1.07        | 1.04         | 1.05        | 1.06        | 1.04            |
| <b>2011</b>       | 0.98 - 1.17 | 0.95 - 1.14  | 0.96 - 1.15 | 0.96 - 1.16 | 0.95 - 1.14     |
| <b>Panama</b>     | 1.00        | 0.99         | 1.01        | 0.99        | 1.00            |
| <b>2013</b>       | 0.90 - 1.10 | 0.89 - 1.10  | 0.91 - 1.12 | 0.89 - 1.10 | 0.90 - 1.11     |
| <b>Suriname</b>   | 0.62        | 0.68         | 0.63        | 0.68        | 0.70            |
| <b>2010</b>       | 0.56 - 0.69 | 0.60 - 0.76  | 0.57 - 0.70 | 0.61 - 0.76 | 0.63 - 0.79     |
| <b>Uruguay</b>    | NA          | NA           | NA          | NA          | NA              |
| <b>2012</b>       | NA          | NA           | NA          | NA          | NA              |

NA: not available.

Table S9 - Crude and adjusted coverage ratios (95%CI) for antenatal care (four or more visits) in afrodescendant women, compared to the reference.

| Country/year      | Crude CR    | Adjusted for |             |             |                 |
|-------------------|-------------|--------------|-------------|-------------|-----------------|
|                   |             | Wealth       | Area        | Education   | All stratifiers |
| <b>Belize</b>     | 0.92        | 0.89         | 0.90        | 0.86        | 0.85            |
| <b>2011</b>       | 0.84 - 1.01 | 0.81 - 0.98  | 0.81 - 0.99 | 0.78 - 0.95 | 0.77 - 0.95     |
| <b>Brazil</b>     | 0.96        | 0.97         | 0.98        | 0.97        | 0.97            |
| <b>2006</b>       | 0.92 - 1.01 | 0.92 - 1.02  | 0.92 - 1.02 | 0.92 - 1.02 | 0.92 - 1.02     |
| <b>Colombia</b>   | 0.95        | 0.98         | 0.96        | 0.96        | 0.98            |
| <b>2010</b>       | 0.92 - 0.98 | 0.95 - 1.01  | 0.93 - 0.99 | 0.94 - 0.99 | 0.95 - 1.01     |
| <b>Costa Rica</b> | 1.05        | 1.02         | 1.05        | 1.05        | 1.02            |
| <b>2011</b>       | 0.97 - 1.14 | 0.95 - 1.10  | 0.96 - 1.14 | 0.97 - 1.14 | 0.95 - 1.10     |
| <b>Ecuador</b>    | 0.95        | 1.00         | 0.93        | 1.00        | 1.01            |
| <b>2004</b>       | 0.79 - 1.14 | 0.84 - 1.18  | 0.78 - 1.12 | 0.84 - 1.19 | 0.86 - 1.19     |
| <b>Guyana</b>     | 0.98        | 0.98         | 0.98        | 0.97        | 0.98            |
| <b>2014</b>       | 0.92 - 1.04 | 0.92 - 1.04  | 0.92 - 1.05 | 0.92 - 1.03 | 0.92 - 1.04     |
| <b>Honduras</b>   | 1.07        | 1.05         | 1.06        | 1.06        | 1.04            |
| <b>2011</b>       | 1.03 - 1.11 | 1.00 - 1.09  | 1.02 - 1.10 | 1.01 - 1.10 | 1.00 - 1.09     |
| <b>Panama</b>     | 1.02        | 1.01         | 1.01        | 1.01        | 1.01            |
| <b>2013</b>       | 0.96 - 1.08 | 0.95 - 1.07  | 0.96 - 1.08 | 0.95 - 1.07 | 0.95 - 1.07     |
| <b>Suriname</b>   | 0.82        | 0.85         | 0.82        | 0.85        | 0.86            |
| <b>2010</b>       | 0.74 - 0.90 | 0.76 - 0.96  | 0.74 - 0.91 | 0.76 - 0.95 | 0.77 - 0.97     |
| <b>Uruguay</b>    | 0.89        | 0.94         | 0.89        | 0.90        | 0.95            |
| <b>2012</b>       | 0.63 - 1.25 | 0.69 - 1.28  | 0.63 - 1.25 | 0.61 - 1.34 | 0.68 - 1.32     |

Table S10 - Crude and adjusted coverage ratios (95% CI) for skilled birth attendant in afrodescendant women, compared to the reference category, by country.

| Country/year      | Crude CR    | Adjusted for |             |             |                 |
|-------------------|-------------|--------------|-------------|-------------|-----------------|
|                   |             | Wealth       | Area        | Education   | All stratifiers |
| <b>Belize</b>     | 1.01        | 1.00         | 1.00        | 0.98        | 0.98            |
| <b>2011</b>       | 0.98 - 1.04 | 0.97 - 1.03  | 0.97 - 1.04 | 0.95 - 1.02 | 0.94 - 1.02     |
| <b>Brazil</b>     | 0.99        | 0.99         | 0.98        | 0.98        | 0.99            |
| <b>2006</b>       | 0.97 - 1.01 | 0.97 - 1.00  | 0.97 - 1.00 | 0.97 - 1.00 | 0.97 - 1.00     |
| <b>Colombia</b>   | 0.94        | 0.96         | 0.94        | 0.94        | 0.96            |
| <b>2010</b>       | 0.92 - 0.95 | 0.94 - 0.98  | 0.93 - 0.96 | 0.93 - 0.96 | 0.94 - 0.97     |
| <b>Costa Rica</b> | 1.01        | 1.01         | 1.01        | 1.01        | 1.01            |
| <b>2011</b>       | 1.00 - 1.02 | 1.00 - 1.02  | 1.00 - 1.01 | 1.00 - 1.01 | 1.00 - 1.02     |
| <b>Ecuador</b>    | 0.92        | 0.94         | 0.89        | 0.97        | 0.94            |
| <b>2004</b>       | 0.80 - 1.05 | 0.83 - 1.06  | 0.79 - 1.00 | 0.85 - 1.11 | 0.83 - 1.06     |
| <b>Guyana</b>     | 1.02        | 1.02         | 1.02        | 1.02        | 1.02            |
| <b>2014</b>       | 1.00 - 1.04 | 1.00 - 1.04  | 1.00 - 1.04 | 1.00 - 1.04 | 0.99 - 1.04     |
| <b>Honduras</b>   | 1.06        | 0.99         | 1.02        | 1.03        | 0.98            |
| <b>2011</b>       | 1.00 - 1.11 | 0.94 - 1.04  | 0.97 - 1.07 | 0.97 - 1.09 | 0.94 - 1.04     |
| <b>Panama</b>     | 1.01        | 1.00         | 1.00        | 1.00        | 0.99            |
| <b>2013</b>       | 1.00 - 1.02 | 0.99 - 1.01  | 0.99 - 1.01 | 0.99 - 1.01 | 0.99 - 1.00     |
| <b>Suriname</b>   | 0.94        | 0.99         | 0.97        | 0.97        | 1.00            |
| <b>2010</b>       | 0.91 - 0.97 | 0.96 - 1.03  | 0.94 - 1.00 | 0.94 - 1.00 | 0.97 - 1.04     |
| <b>Uruguay</b>    | 0.96        | 0.96         | 0.96        | 0.95        | 0.95            |
| <b>2012</b>       | 0.90 - 1.03 | 0.89 - 1.03  | 0.89 - 1.03 | 0.88 - 1.03 | 0.88 - 1.03     |

Table S11 - Crude and adjusted coverage ratios (95%CI) for DPT immunization in afrodescendant children, compared to the reference category, by country.

| Country/year       | Crude CR    | Adjusted for |             |             |                 |
|--------------------|-------------|--------------|-------------|-------------|-----------------|
|                    |             | Wealth       | Area        | Education   | All stratifiers |
| <b>Belize</b>      | 1.05        | 1.06         | 1.10        | 1.07        | 1.11            |
| <b>2011</b>        | 0.91 - 1.20 | 0.92 - 1.23  | 0.94 - 1.28 | 0.92 - 1.24 | 0.95 - 1.30     |
| <b>Brazil</b>      | NA          | NA           | NA          | NA          | NA              |
| <b>2006</b>        | NA          | NA           | NA          | NA          | NA              |
| <b>Colombia</b>    | 0.93        | 0.95         | 0.93        | 0.93        | 0.95            |
| <b>2010</b>        | 0.89 - 0.98 | 0.91 - 0.99  | 0.89 - 0.98 | 0.89 - 0.98 | 0.91 - 1.00     |
| <b>Costa Rica*</b> |             |              |             |             |                 |
| <b>2011</b>        |             |              |             |             |                 |
| <b>Ecuador</b>     | 0.96        | 0.97         | 0.93        | 0.98        | 1.00            |
| <b>2004</b>        | 0.77 - 1.19 | 0.79 - 1.20  | 0.76 - 1.16 | 0.80 - 1.21 | 0.81 - 1.22     |
| <b>Guyana</b>      | 0.99        | 0.99         | 0.99        | 0.98        | 0.98            |
| <b>2014</b>        | 0.92 - 1.06 | 0.92 - 1.06  | 0.92 - 1.06 | 0.92 - 1.05 | 0.92 - 1.05     |
| <b>Honduras</b>    | 1.02        | 1.02         | 1.02        | 1.02        | 1.02            |
| <b>2011</b>        | 0.99 - 1.05 | 0.99 - 1.05  | 0.99 - 1.05 | 0.99 - 1.05 | 0.99 - 1.05     |
| <b>Panama</b>      | 0.86        | 0.86         | 0.88        | 0.87        | 0.88            |
| <b>2013</b>        | 0.72 - 1.03 | 0.72 - 1.03  | 0.74 - 1.05 | 0.72 - 1.04 | 0.74 - 1.05     |
| <b>Suriname</b>    | 1.17        | 1.06         | 1.10        | 1.12        | 1.06            |
| <b>2010</b>        | 0.98 - 1.39 | 0.86 - 1.31  | 0.91 - 1.32 | 0.92 - 1.37 | 0.86 - 1.31     |
| <b>Uruguay</b>     | NA          | NA           | NA          | NA          | NA              |
| <b>2012</b>        | NA          | NA           | NA          | NA          | NA              |

\*Sample size < 25. NA: not available.



Table S12 - Meta-analysis and meta-regression results for RMNCH interventions according to ethnic group in Latin America and the Caribbean. Co-variables include GDP per capita, urbanization and ethnic group composition of the countries under study.

| Ethnic group                  | Indigenous            |                       |                       |                       | Afrodescendants       |                       |                       |                       |
|-------------------------------|-----------------------|-----------------------|-----------------------|-----------------------|-----------------------|-----------------------|-----------------------|-----------------------|
|                               | CPMO                  | ANC                   | SBA                   | DPT                   | CPMO                  | ANC                   | SBA                   | DPT                   |
| <b>Pooled effect (CI 95%)</b> | 0.79<br>(0.72 - 0.87) | 0.91<br>(0.87 - 0.95) | 0.85<br>(0.80 - 0.90) | 0.97<br>(0.95 - 1.00) | 0.92<br>(0.87 - 0.99) | 0.98<br>(0.94 - 1.01) | 0.99<br>(0.98 - 1.00) | 0.99<br>(0.95 - 1.03) |
| <b>I<sup>2</sup></b>          | 93.7                  | 87.1                  | 93.4                  | 17.4                  | 79.5                  | 57.3                  | 76.1                  | 43.8                  |
| <b>Adjusted R<sup>2</sup></b> | *                     | 46.1                  | *                     | *                     | *                     | *                     | 26.8                  | *                     |

(\*) Model did not converge or R<sup>2</sup> value was negative, indicating that the explanatory variables did not account for the variability.

Table S13 - Indigenous groups and proportion of population in recent national censuses in the countries included in the analyses.

| Country                   | Data source | Ethnic groups    | Population | Percent of total population |
|---------------------------|-------------|------------------|------------|-----------------------------|
| <b>Belize</b>             | 2010 Census | Maya Ketchi      | 20616      | 6.4                         |
|                           |             | Maya Mopan       | 13022      | 4.0                         |
|                           |             | Maya Yucatec     | 2,869      | 0.9                         |
|                           |             | TOTAL            | 36507      | 11.2                        |
| <b>Bolivia</b>            | 2012 Census | Araona           | 910        | <0.1                        |
|                           |             | Aymara           | 1,191,352  | 17.2                        |
|                           |             | Ayoreo           | 1,862      | <0.1                        |
|                           |             | Baure            | 2,319      | <0.1                        |
|                           |             | Canichana        | 617        | <0.1                        |
|                           |             | Cavineño         | 2,005      | <0.1                        |
|                           |             | Cayubaba         | 1,424      | <0.1                        |
|                           |             | Chacobo          | 826        | <0.1                        |
|                           |             | Chipaya          | 786        | <0.1                        |
|                           |             | Chiquitano       | 87,885     | 1.3                         |
|                           |             | Esse Eija        | 695        | <0.1                        |
|                           |             | Guaraní          | 58,990     | 0.9                         |
|                           |             | Guarasugwe       | 42         | <0.1                        |
|                           |             | Guarayo          | 13,621     | 0.2                         |
|                           |             | Itonama          | 10,275     | 0.1                         |
|                           |             | Joaquiniano      | 2,797      | <0.1                        |
|                           |             | Kallawaya        | 7,389      | 0.1                         |
|                           |             | Leco             | 9,006      | 0.1                         |
|                           |             | Machinerí        | 38         | <0.1                        |
|                           |             | Maropa           | 2,857      | <0.1                        |
|                           |             | Mojeño           | 31,078     | 0.4                         |
|                           |             | Moré             | 155        | <0.1                        |
|                           |             | Mosetén          | 1,989      | <0.1                        |
|                           |             | Movima           | 12,213     | 0.2                         |
|                           |             | Murato           | 143        | <0.1                        |
|                           |             | Pacahuara        | 161        | <0.1                        |
|                           |             | Quechua          | 1,281,116  | 18.5                        |
|                           |             | Sirionó          | 446        | <0.1                        |
|                           |             | Tacana           | 11,173     | 0.2                         |
|                           |             | Tapiete          | 99         | <0.1                        |
|                           |             | Tsimane (Chimán) | 6,464      | 0.1                         |
|                           |             | Weenayek         | 3,322      | <0.1                        |
|                           |             | Yaminahua        | 132        | <0.1                        |
| Yuki                      | 202         | <0.1             |            |                             |
| Yuracaré                  | 3,394       | <0.1             |            |                             |
| Yuracaré-mojeño           | 292         | <0.1             |            |                             |
| Others                    | 42,188      | 0.6              |            |                             |
| Not specified             | 4,419       | 0.1              |            |                             |
| TOTAL                     |             | 2,794,682        | 40.4       |                             |
| <b>Brazil<sup>1</sup></b> | 2010 Census | Baré             | 11,990     | <0.1                        |
|                           |             | Guarani Kaiowá   | 43,401     | <0.1                        |
|                           |             | Kaingang         | 37,470     | <0.1                        |
|                           |             | Makuxí           | 28,912     | <0.1                        |
|                           |             | Mundurukú        | 13,103     | <0.1                        |
|                           |             | Múra             | 12,479     | <0.1                        |
|                           |             | Pataxó           | 13,588     | <0.1                        |
| Potiguara                 | 20,554      | <0.1             |            |                             |

|                 |             |                                      |         |      |
|-----------------|-------------|--------------------------------------|---------|------|
|                 |             | Sateré-Mawé                          | 13,310  | <0.1 |
|                 |             | Tenetehara                           | 24,428  | <0.1 |
|                 |             | Terena                               | 28,845  | <0.1 |
|                 |             | Tikúna                               | 46,045  | <0.1 |
|                 |             | Xavante                              | 19,259  | <0.1 |
|                 |             | Xucuru                               | 12,471  | <0.1 |
|                 |             | Yanomámi                             | 21,982  | <0.1 |
|                 |             | Monirity groups                      | 470,126 | 0.2  |
|                 |             | TOTAL                                | 817,963 | 0.4  |
| <b>Colombia</b> | 2005 Census | Achagua                              | 796     | 0.1  |
|                 |             | Amorua                               | 464     | <0.1 |
|                 |             | Andoke                               | 136     | <0.1 |
|                 |             | Arhuaco                              | 21,866  | 1.5  |
|                 |             | Arzario                              | 10,703  | 0.8  |
|                 |             | Awa Kwaiker                          | 25,813  | 1.9  |
|                 |             | Bará                                 | 208     | <0.1 |
|                 |             | Barasana                             | 351     | <0.1 |
|                 |             | Barí                                 | 5,923   | 0.4  |
|                 |             | Betoye                               | 394     | <0.1 |
|                 |             | Bora                                 | 933     | 0.1  |
|                 |             | Calima                               | 76      | <0.1 |
|                 |             | Cañamomo                             | 21,628  | 1.6  |
|                 |             | Carabaya                             | 26      | <0.1 |
|                 |             | Carapana                             | 482     | <0.1 |
|                 |             | Chimila                              | 1,614   | 0.1  |
|                 |             | Chiricoa                             | 46      | <0.1 |
|                 |             | Chitarero                            | 161     | <0.1 |
|                 |             | Cocama                               | 2,204   | 0.2  |
|                 |             | Coconuco                             | 16,492  | 1.2  |
|                 |             | Coreguaje                            | 1,767   | 0.1  |
|                 |             | Coyaima                              | 58,810  | 4.2  |
|                 |             | Desano                               | 2,179   | 0.2  |
|                 |             | Dujos                                | 56      | <0.1 |
|                 |             | Embera                               | 37,327  | 2.7  |
|                 |             | Embera Chamí                         | 29,094  | 2.1  |
|                 |             | Embera katio                         | 38,259  | 2.8  |
|                 |             | Eperara Siapidara                    | 3,853   | 0.3  |
|                 |             | Guambiano                            | 21,085  | 1.5  |
|                 |             | Guanaca                              | 12      | <0.1 |
|                 |             | Guane                                | 812     | 0.1  |
|                 |             | Guayabero                            | 617     | <0.1 |
|                 |             | Indigenous from Bolivia              | 3       | <0.1 |
|                 |             | Indigenous from Brazil               | 306     | <0.1 |
|                 |             | Indigenous from Ecuador              | 407     | <0.1 |
|                 |             | Indigenous from Guatemala<br>(Mayas) | 7       | <0.1 |
|                 |             | Indigenous from Mexico               | 12      | <0.1 |
|                 |             | Indigenous from Peru                 | 98      | <0.1 |
|                 |             | Indigenous from Venezuela            | 8       | <0.1 |
|                 |             | Inga                                 | 15,450  | 1.1  |
|                 |             | Kamëntsa                             | 4,879   | 0.4  |
|                 |             | Kankuama                             | 12,714  | 0.9  |
|                 |             | Karijona                             | 425     | <0.1 |
|                 |             | Kawiyari                             | 233     | <0.1 |
|                 |             | Kichwa                               | 481     | <0.1 |
|                 |             | Kofan                                | 1,657   | 0.1  |
|                 |             | Kogui                                | 9,173   | 0.7  |

|                   |                      |           |        |     |
|-------------------|----------------------|-----------|--------|-----|
|                   | Kubeo                | 3,926     | 0.3    |     |
|                   | Kuiba                | 769       | 0.1    |     |
|                   | Kurripako            | 4,340     | 0.3    |     |
|                   | Letuama              | 202       | <0.1   |     |
|                   | Makaguaje            | 145       | <0.1   |     |
|                   | Makaguane (Hitnu)    | 656       | <0.1   |     |
|                   | Makuna               | 612       | <0.1   |     |
|                   | Masiguare            | 268       | <0.1   |     |
|                   | Matapi               | 71        | <0.1   |     |
|                   | Miraña               | 274       | <0.1   |     |
|                   | Mokaná               | 24,825    | 1.8    |     |
|                   | Muisca               | 14,051    | 1.0    |     |
|                   | Nasa(Páez)           | 186,178   | 13.4   |     |
|                   | Nonuya               | 31        | <0.1   |     |
|                   | Nukak (Maku)         | 1,348     | 0.1    |     |
|                   | Ocaina               | 285       | <0.1   |     |
|                   | Otavaleño            | 975       | 0.1    |     |
|                   | Panches              | 8         | <0.1   |     |
|                   | Piapoco              | 3,508     | 0.3    |     |
|                   | Piaroa               | 720       | 0.1    |     |
|                   | Piratapuyo           | 814       | 0.1    |     |
|                   | Pisamira             | 151       | <0.1   |     |
|                   | Puinave              | 4,178     | 0.3    |     |
|                   | Quillasinga (Pastos) | 129,941   | 9.3    |     |
|                   | Quimbaya             | 163       | <0.1   |     |
|                   | Sáliba               | 3,035     | 0.2    |     |
|                   | Senú                 | 233,052   | 16.7   |     |
|                   | Sikuani              | 19,791    | 1.4    |     |
|                   | Siona                | 1,829     | 0.1    |     |
|                   | Siriano              | 544       | <0.1   |     |
|                   | Tairona              | 19        | <0.1   |     |
|                   | Taiwano              | 166       | <0.1   |     |
|                   | Tanimuka             | 342       | <0.1   |     |
|                   | Tariano              | 197       | <0.1   |     |
|                   | Tatuyo               | 381       | <0.1   |     |
|                   | Tikuna               | 7,879     | 0.6    |     |
|                   | Totoro               | 6,289     | 0.5    |     |
|                   | Tsiripu              | 17        | <0.1   |     |
|                   | Tucano               | 2,016     | 0.1    |     |
|                   | Tule (Kuna)          | 2,383     | 0.2    |     |
|                   | Tuyuka               | 444       | <0.1   |     |
|                   | U'wa (Tunebo)        | 7,581     | 0.5    |     |
|                   | Uitoto               | 6,444     | 0.5    |     |
|                   | Wanano               | 1,305     | 0.1    |     |
|                   | Waunan               | 9,066     | 0.7    |     |
|                   | Wayuu                | 270,413   | 19.4   |     |
|                   | Yagua                | 1,007     | 0.1    |     |
|                   | Yanacona             | 33,253    | 2.4    |     |
|                   | Yaruro               | 63        | <0.1   |     |
|                   | Yauna                | 99        | <0.1   |     |
|                   | Yuko                 | 4,761     | 0.3    |     |
|                   | Yukuna               | 396       | <0.1   |     |
|                   | Yurutí               | 377       | <0.1   |     |
|                   | No information       | 50,995    | 3.7    |     |
|                   | TOTAL                | 1,392,623 | 3.4    |     |
| <b>Costa Rica</b> | 2011 Census          | Bribi     | 18,198 | 0.4 |

|                            |             |                        |           |      |
|----------------------------|-------------|------------------------|-----------|------|
|                            |             | Brunca or Boruca       | 5,555     | 0.1  |
|                            |             | Cabécar                | 16,985    | 0.4  |
|                            |             | Chorotega              | 11,442    | 0.3  |
|                            |             | Huetar                 | 3,461     | 0.1  |
|                            |             | Maleku or Guatuso      | 1,780     | <0.1 |
|                            |             | Nögbe or Guaymí        | 9,543     | 0.2  |
|                            |             | Terire or Térraba      | 2,665     | 0.1  |
|                            |             | TOTAL                  | 69,629    | 1.6  |
| <b>Ecuador<sup>2</sup></b> | 2010 Census | A'í Cofán              | 10,240    | <0.1 |
|                            |             | Achuar                 | 23,580    | <0.1 |
|                            |             | Awa                    | 32,202    | <0.1 |
|                            |             | Chachi                 | 53,605    | <0.1 |
|                            |             | Chibuleo               | 37,205    | <0.1 |
|                            |             | Epera                  | 638       | <0.1 |
|                            |             | Huaorani               | 15,047    | <0.1 |
|                            |             | Kañari                 | 218,648   | 0.2  |
|                            |             | Karanki                | 38,225    | <0.1 |
|                            |             | Kayambi                | 131,811   | 0.1  |
|                            |             | Kichwa Amazonía        | 108,476   | 0.1  |
|                            |             | Kichwa de Tungurahua   | 1,924,998 | 1.7  |
|                            |             | Kitu Kara              | 14,576    | <0.1 |
|                            |             | Manta Huancavilca Puná | 1,972     | <0.1 |
|                            |             | Natabuela              | 6,376     | <0.1 |
|                            |             | Otavalo                | 307,310   | 0.3  |
|                            |             | Panzaleo               | 265,436   | 0.2  |
|                            |             | Puruhá                 | 634,394   | 0.5  |
|                            |             | Quisapincha            | 40,501    | <0.1 |
|                            |             | Salasaka               | 51,741    | <0.1 |
|                            |             | Saraguro               | 86,543    | 0.1  |
|                            |             | Secoya                 | 2,354     | <0.1 |
|                            |             | Shiwiar                | 6,003     | <0.1 |
|                            |             | Shuar                  | 516,895   | 0.4  |
|                            |             | Siona                  | 2,982     | <0.1 |
|                            |             | Tsa'chila              | 14,556    | <0.1 |
|                            |             | Waranka                | 5,954     | <0.1 |
|                            |             | Zapara                 | 3,394     | <0.1 |
|                            |             | Others indigenous      | 3,589,747 | 3.1  |
|                            |             | TOTAL                  | 8,145,407 | 7.0  |
| <b>Guatemala</b>           | 2002 Census | Achi                   | 105,992   | 0.9  |
|                            |             | Akateko                | 39,370    | 0.4  |
|                            |             | Awakateko              | 11,068    | 0.1  |
|                            |             | Cho'rti'               | 46,833    | 0.4  |
|                            |             | Chuj                   | 64,438    | 0.6  |
|                            |             | Itza                   | 1,983     | <0.1 |
|                            |             | Ixil                   | 95,315    | 0.8  |
|                            |             | Jakalteco              | 47,024    | 0.4  |
|                            |             | Kaqchikel              | 832,968   | 7.4  |
|                            |             | K'iche'                | 1,270,953 | 11.3 |
|                            |             | Mam                    | 617,171   | 5.5  |
|                            |             | Mopan                  | 2,891     | <0.1 |
|                            |             | Poqomam                | 42,009    | 0.4  |
|                            |             | Poqomchi'              | 114,423   | 1.0  |
|                            |             | Q'anjon'al             | 159,030   | 1.4  |
|                            |             | Q'eqchi'               | 852,012   | 7.6  |
|                            |             | Sakapulteko            | 9,763     | 0.1  |
|                            |             | Sipakapense            | 10,652    | 0.1  |

|                           |             |                              |           |      |
|---------------------------|-------------|------------------------------|-----------|------|
|                           |             | Tektiteko                    | 2,077     | <0.1 |
|                           |             | Tzúujil                      | 78,498    | 0.7  |
|                           |             | Uspanteko                    | 7,494     | 0.1  |
|                           |             | Xinka                        | 16,214    | 0.1  |
|                           |             | TOTAL                        | 4,428,178 | 39.4 |
| <b>Guyana<sup>4</sup></b> | 2012 Census | Amerindian                   | 78,492    | 10.5 |
| <b>Honduras</b>           | 2013 Census | Lenca                        | 453672    | 5.5  |
|                           |             | Maya -Chortí                 | 33256     | 0.4  |
|                           |             | Miskito                      | 80007     | 1.0  |
|                           |             | Nahua                        | 6339      | 0.1  |
|                           |             | Pech                         | 6024      | 0.1  |
|                           |             | Tawahka                      | 2690      | <0.1 |
|                           |             | Tolupán                      | 19033     | 0.2  |
|                           |             | TOTAL                        | 601,021   | 7.2  |
| <b>Mexico<sup>3</sup></b> | 2010 Census | Aguacateco (Awakateko)       | 1,920     | <0.1 |
|                           |             | Amuzgo                       | 1,990     | <0.1 |
|                           |             | Amuzgo de Guerrero           | 43,644    | <0.1 |
|                           |             | Amuzgo de Oaxaca             | 5,001     | <0.1 |
|                           |             | Ayapaneco                    | 4         | <0.1 |
|                           |             | Cakchiquel (Kaqchikel)       | 143       | <0.1 |
|                           |             | Chatino                      | 45,019    | <0.1 |
|                           |             | Chichimeca jonaz             | 2,190     | <0.1 |
|                           |             | Chinanteco                   | 131,382   | 0.1  |
|                           |             | Chinanteco de Lalana         | 1         | <0.1 |
|                           |             | Chinanteco de Ojitlán        | 1,938     | <0.1 |
|                           |             | Chinanteco de Petlapa        | 9         | <0.1 |
|                           |             | Chinanteco de Sochiapan      | 2         | <0.1 |
|                           |             | Chinanteco de Usila          | 77        | <0.1 |
|                           |             | Chinanteco de Valle Nacional | 29        | <0.1 |
|                           |             | Chocho (Chocholteco)         | 814       | <0.1 |
|                           |             | Chol (Ch'ol)                 | 212,117   | 0.2  |
|                           |             | Chontal                      | 1,102     | <0.1 |
|                           |             | Chontal de Oaxaca            | 4,394     | <0.1 |
|                           |             | Chontal de Tabasco           | 36,810    | <0.1 |
|                           |             | Chuj                         | 2,503     | <0.1 |
|                           |             | Cochimí                      | 88        | <0.1 |
|                           |             | Cora                         | 20,078    | <0.1 |
|                           |             | Cucapá                       | 145       | <0.1 |
|                           |             | Cuicateco                    | 12,785    | <0.1 |
|                           |             | Guarijío                     | 2,136     | <0.1 |
|                           |             | Huasteco                     | 161,120   | 0.2  |
|                           |             | Huave                        | 17,554    | <0.1 |
|                           |             | Huichol                      | 44,788    | <0.1 |
|                           |             | Ixcateco                     | 190       | <0.1 |
|                           |             | Ixil                         | 83        | <0.1 |
|                           |             | Jacalteco (Jakalteko)        | 590       | <0.1 |
|                           |             | Kanjobal (Q'anjob'al)        | 9,324     | <0.1 |
|                           |             | Kekchi (Q'eqchi')            | 1,248     | <0.1 |
|                           |             | Kikapú (Kickapoo)            | 423       | <0.1 |
|                           |             | Kiliwa                       | 46        | <0.1 |
|                           |             | Kumiai                       | 289       | <0.1 |
|                           |             | Lacandón                     | 20        | <0.1 |
|                           |             | Mame (Mam)                   | 10,374    | <0.1 |
|                           |             | Matlatzinca                  | 1,096     | <0.1 |
|                           |             | Maya                         | 786,113   | 0.8  |
|                           |             | Mayo                         | 39,616    | <0.1 |

|                  |                                      |           |      |
|------------------|--------------------------------------|-----------|------|
|                  | Mazahua                              | 135,897   | 0.1  |
|                  | Mazateco                             | 223,073   | 0.2  |
|                  | Mixe                                 | 132,759   | 0.1  |
|                  | Mixteco                              | 471,710   | 0.5  |
|                  | Mixteco de la costa                  | 27        | <0.1 |
|                  | Mixteco de la mixteca alta           | 2,493     | <0.1 |
|                  | Mixteco de la mixteca baja           | 2,197     | <0.1 |
|                  | Mixteco de la zona mazateca          | 6         | <0.1 |
|                  | Mixteco de Puebla                    | 39        | <0.1 |
|                  | Motocintleco (Qoto'k)                | 106       | <0.1 |
|                  | Náhuatl                              | 1,544,968 | 1.5  |
|                  | Ocuilteco (Tlahuica)                 | 737       | <0.1 |
|                  | Otomí                                | 284,992   | 0.3  |
|                  | Paipai                               | 199       | <0.1 |
|                  | Pame                                 | 11,019    | <0.1 |
|                  | Papabuco                             | 2         | <0.1 |
|                  | Pápago                               | 161       | <0.1 |
|                  | Pima                                 | 851       | <0.1 |
|                  | Popoloca                             | 17,964    | <0.1 |
|                  | Popoluca                             | 41,068    | <0.1 |
|                  | Popoluca de la sierra                | 21        | <0.1 |
|                  | Popoluca de Oluta                    | 1         | <0.1 |
|                  | Popoluca de Texistepec               | 1         | <0.1 |
|                  | Purépecha (Tarasco)                  | 124,494   | 0.1  |
|                  | Quiché (K'iche')                     | 389       | <0.1 |
|                  | Seri                                 | 764       | <0.1 |
|                  | Solteco                              | 10        | <0.1 |
|                  | Tacuate                              | 1,523     | <0.1 |
|                  | Tarahumara                           | 85,018    | 0.1  |
|                  | Tepehua                              | 8,868     | <0.1 |
|                  | Tepehuano                            | 2,929     | <0.1 |
|                  | Tepehuano de Chihuahua               | 7,906     | <0.1 |
|                  | Tepehuano de Durango                 | 25,038    | <0.1 |
|                  | Tlapaneco                            | 120,072   | 0.1  |
|                  | Tojolabal                            | 51,733    | 0.1  |
|                  | Totonaca (Totonaco)                  | 244,033   | 0.2  |
|                  | Triqui                               | 25,883    | <0.1 |
|                  | Tzeltal (Tseltal)                    | 445,856   | 0.4  |
|                  | Tzotzil (Tsotsil)                    | 404,704   | 0.4  |
|                  | Yaqui                                | 17,116    | <0.1 |
|                  | Zapoteco                             | 425,123   | 0.4  |
|                  | Zapoteco de Ixtlán                   | 377       | <0.1 |
|                  | Zapoteco del Istmo                   | 613       | <0.1 |
|                  | Zapoteco del rincón                  | 1         | <0.1 |
|                  | Zapoteco sureño                      | 22,911    | <0.1 |
|                  | Zapoteco vallista                    | 1,394     | <0.1 |
|                  | Zoque                                | 63,022    | 0.1  |
|                  | Other indigenous language<br>Mexico  | 145       | <0.1 |
|                  | Other indigenous language<br>América | 833       | <0.1 |
|                  | Indigenous language not<br>specified | 144,987   | 0.1  |
|                  | TOTAL                                | 6,695,228 | 6.7  |
| <b>Nicaragua</b> | 2005 Census                          |           |      |
|                  | Cacaopera-Matagalpa                  | 15,240    | 0.3  |
|                  | Chorotega-Nahua-Mange                | 46,002    | 0.9  |
|                  | Mayangna-Sumu                        | 9,756     | 0.2  |

|                             |             |                               |           |      |
|-----------------------------|-------------|-------------------------------|-----------|------|
|                             |             | Miskitu                       | 120,817   | 2.3  |
|                             |             | Nahoa-Nicarao                 | 11,113    | 0.2  |
|                             |             | Rama                          | 4,185     | 0.1  |
|                             |             | Ulwa                          | 698       | <0.1 |
|                             |             | Xiu-Sutiava                   | 19,949    | 0.4  |
|                             |             | TOTAL                         | 227,760   | 4.4  |
| <b>Panama</b>               | 2010 Census | Bokota                        | 1,959     | <0.1 |
|                             |             | Bri Bri                       | 1,068     | <0.1 |
|                             |             | Buglé                         | 24,912    | 0.1  |
|                             |             | Emberá                        | 31,284    | 0.1  |
|                             |             | Kuna                          | 80,526    | 0.2  |
|                             |             | Ngäbe                         | 260,058   | 0.8  |
|                             |             | Teribe/Naso                   | 4,046     | <0.1 |
|                             |             | Wounaan                       | 7,279     | <0.1 |
|                             |             | Other                         | 460       | <0.1 |
|                             |             | TOTAL                         | 411,592   | 1.2  |
| <b>Paraguay</b>             | 2012 Census | Ache                          | 1,884     | <0.1 |
|                             | and         | Angaité                       | 5,992     | 0.1  |
|                             | 2012        | Ava Guaraní                   | 17,921    | 0.3  |
|                             | Indigenous  | Ayoreo                        | 2,461     | <0.1 |
|                             | Census      | Enlhet Norte                  | 8,167     | 0.1  |
|                             |             | Enxet Sur                     | 7,284     | 0.1  |
|                             |             | Guaná                         | 393       | <0.1 |
|                             |             | Guaraní Ñandéva               | 2,470     | <0.1 |
|                             |             | Guaraní Occidental            | 3,587     | 0.1  |
|                             |             | Maká                          | 1,888     | <0.1 |
|                             |             | Manjui                        | 582       | <0.1 |
|                             |             | Mbya Guaraní                  | 20,546    | 0.3  |
|                             |             | Nivaclé                       | 14,768    | 0.2  |
|                             |             | Paĩ Tavyterã                  | 15,494    | 0.2  |
|                             |             | Qom                           | 1,939     | <0.1 |
|                             |             | Sanapaná                      | 2,866     | <0.1 |
|                             |             | Toba Maskoy                   | 2,072     | <0.1 |
|                             |             | Tomaráho                      | 152       | <0.1 |
|                             |             | Ybytosó                       | 1,915     | <0.1 |
|                             |             | Indigenous in the Census 2012 | 4,769     | 0.1  |
|                             |             | TOTAL                         | 117,150   | 1.8  |
| <b>Peru</b>                 | 2007 Census | Asháninka                     | 67,724    | 0.3  |
|                             |             | Aymará                        | 443,248   | 1.7  |
|                             |             | Quechua                       | 3,360,331 | 13.0 |
|                             |             | Other indigenous language     | 174,410   | 0.7  |
|                             |             | TOTAL                         | 4,045,713 | 15.7 |
| <b>Suriname<sup>4</sup></b> | 2012 Census | Indigenous                    | 20,344    | 3.8  |
| <b>Uruguay<sup>4</sup></b>  | 2011 Census | Indigenous                    | 76,452    | 2.4  |

<sup>1</sup> In Brazil exist 305 indigenous groups, but the census report shows only the 15 largest. <sup>2</sup> Information from 2001 census, but proportional to 2010 census. <sup>3</sup> Population of five years or more. <sup>4</sup> The information from Guyana, Suriname and Uruguay is not disaggregated.



Table S14 - Legal standpoint of indigenous people in the countries included in the analyses.

| Country                   | International treaties |                                                          | Country level <sup>3</sup>                                                                                                           |                         |                                                                                                |
|---------------------------|------------------------|----------------------------------------------------------|--------------------------------------------------------------------------------------------------------------------------------------|-------------------------|------------------------------------------------------------------------------------------------|
|                           | ILO 169 <sup>1</sup>   | UNDRIP <sup>2</sup>                                      | Institution(s) in charge of indigenous affairs                                                                                       | Year of creation        | Hierarchical dependence                                                                        |
| <b>Belize</b>             | no                     | yes                                                      | None                                                                                                                                 |                         |                                                                                                |
| <b>Bolivia</b>            | yes                    | yes                                                      | Consejo Plurinacional para Vivir Bien en Armonía y Equilibrio con la Madre Tierra                                                    | 2012                    | Ministerio de Medio Ambiente y Agua                                                            |
|                           |                        |                                                          | Viceministerio de Descolonización                                                                                                    | 2009                    | Ministerio de Culturas y Turismo                                                               |
|                           |                        |                                                          | Viceministerio de Interculturalidad                                                                                                  | 2009                    | Ministerio de Culturas y Turismo                                                               |
|                           |                        |                                                          | Viceministerio de Igualdad de Oportunidades                                                                                          | 2012                    | Ministerio de Justicia                                                                         |
|                           |                        |                                                          | Viceministerio de Autonomías Indígena Originario Campesinas                                                                          | 2009                    | Ministerio de Autonomías                                                                       |
|                           |                        |                                                          | Viceministerio de Justicia Indígena Originario Campesina (VJIOC)                                                                     | 2009                    | Ministerio de Justicia                                                                         |
|                           |                        |                                                          | Unidad de Políticas Intraculturales, Interculturales y Plurilingüismo (UPIIP)                                                        | 2010                    | Ministerio de Educación                                                                        |
|                           |                        | Instituto Plurinacional de Estudio de Lenguas y Culturas | 2012                                                                                                                                 | Ministerio de Educación |                                                                                                |
| <b>Brazil</b>             | yes                    | yes                                                      | Fundação Nacional do Índio (FUNAI)                                                                                                   | 1967                    | Ministério da Justiça                                                                          |
| <b>Colombia</b>           | yes                    | yes                                                      | Dirección de Asuntos Indígenas, Minorías y Rom                                                                                       | 2005                    | Ministerio del Interior y de Justicia                                                          |
|                           |                        |                                                          | Programa Presidencial para la Formulación de Estrategias y Acciones para el Desarrollo Integral de los Pueblos Indígenas de Colombia | 2007                    | Vicepresidencia de la República                                                                |
| <b>Costa Rica</b>         | yes                    | yes                                                      | Comisión Nacional de Asuntos Indígenas (CONAI)                                                                                       | 1973                    | Ministerio de Planificación Nacional y Política Económica                                      |
| <b>Ecuador</b>            | yes                    | yes                                                      | Consejos Nacionales para la Igualdad                                                                                                 | 2012                    |                                                                                                |
|                           |                        |                                                          | Subsecretaría de Pueblos e Interculturalidad                                                                                         | 2012                    | Presidencia del Ecuador, Secretaría de Pueblos, Movimientos Sociales y Participación Ciudadana |
| <b>Guatemala</b>          | yes                    | yes                                                      | Fondo de Desarrollo Indígena Guatemalteco (FODIGUA)                                                                                  | 1994                    | Presidencia de la República                                                                    |
|                           |                        |                                                          | Comisión Presidencial contra la Discriminación y el Racismo contra los Pueblos Indígenas en Guatemala (CODISRA)                      | 1999                    | Ministerio de Salud Pública y Asistencia Social                                                |
|                           |                        |                                                          | Defensoría de la Mujer Indígena                                                                                                      | 1999                    | Secretaría de la Presidencia                                                                   |
| <b>Guyana<sup>4</sup></b> | no                     | yes                                                      | Ministry of Indigenous Peoples' Affairs                                                                                              | 1992                    | Office of President                                                                            |
| <b>Honduras</b>           | yes                    | yes                                                      | Secretaría de Estado en los Despachos de Pueblos Indígenas y Afrohondureños (SEDINAFROH)                                             | 2010                    | SEDINAFROH                                                                                     |
| <b>Mexico</b>             | yes                    | yes                                                      | Comisión Nacional para el Desarrollo de los Pueblos Indígenas (CDI)                                                                  | 2003                    | Presidencia de la República                                                                    |
| <b>Nicaragua</b>          | yes                    | yes                                                      | Consejo de Desarrollo de la Costa del Caribe                                                                                         | 2007                    |                                                                                                |

|                 |     |     |                                                                                              |      |                                            |
|-----------------|-----|-----|----------------------------------------------------------------------------------------------|------|--------------------------------------------|
| <b>Panama</b>   | no  | yes | Dirección Nacional de Política Indígena                                                      | 2008 | Ministerio de Trabajo y Desarrollo Laboral |
|                 | yes | yes | Red de Políticas Públicas Indígenas                                                          | 2012 | Ministerio de la Presidencia               |
| <b>Paraguay</b> | yes | yes | Instituto Paraguayo del Indígena / Centro de Atención al Indígena (CENADI)                   | 1981 | Presidencia de la República                |
| <b>Peru</b>     | yes | yes | Dirección General de Interculturalidad y Derechos de los Pueblos (incluye al antiguo INDEPA) | 2010 | Ministerio de Cultura                      |
| <b>Suriname</b> | no  | yes | None                                                                                         |      |                                            |
| <b>Uruguay</b>  | no  | yes | None                                                                                         |      |                                            |

<sup>1</sup> Ratification of the International Labour Organization's Convention No. 169 on Indigenous and Tribal Peoples (1989). <sup>2</sup> Ratification of the United Nations Declaration on the Rights of Indigenous Peoples (2007). <sup>3</sup> Data source: CEPAL, Mujeres indígenas en América Latina. Dinámicas demográficas y sociales en el marco de los derechos humanos. <sup>4</sup> Data source: Technical note on Guyana Indigenous.

Table S15 – P values for comparisons presented in the Figure 2 and Figure 3 of the manuscript.

| Country/year           | Indigenous      |          |        |          |        |          |        |          |
|------------------------|-----------------|----------|--------|----------|--------|----------|--------|----------|
|                        | CPMO            |          | ANC    |          | SBA    |          | DPT    |          |
|                        | Crude           | Adjusted | Crude  | Adjusted | Crude  | Adjusted | Crude  | Adjusted |
| <b>Belize 2011</b>     | <0.001          | <0.001   | <0.001 | 0.002    | 0.056  | 0.559    | 0.813  | 0.507    |
| <b>Brazil 2006</b>     | 0.438           | 0.740    | 0.224  | 0.223    | 0.149  | 0.157    | NA     | NA       |
| <b>Bolivia 2008</b>    | <0.001          | <0.001   | <0.001 | <0.001   | <0.001 | <0.001   | 0.072  | 0.059    |
| <b>Colombia 2010</b>   | <0.001          | <0.001   | <0.001 | <0.001   | <0.001 | <0.001   | 0.110  | 0.708    |
| <b>Costa Rica 2011</b> | 0.238           | 0.402    | 0.033  | 0.027    | 0.107  | 0.119    | 0.402  | 0.657    |
| <b>Ecuador 2004</b>    | <0.001          | <0.001   | <0.001 | <0.001   | <0.001 | <0.001   | 0.059  | 0.371    |
| <b>Guatemala 2014</b>  | <0.001          | <0.001   | 0.002  | 0.793    | <0.001 | <0.001   | 0.001  | 0.110    |
| <b>Guyana 2014</b>     | 0.261           | 0.668    | 0.001  | 0.013    | <0.001 | <0.001   | 0.217  | 0.397    |
| <b>Honduras 2011</b>   | 0.077           | 0.415    | 0.358  | 0.754    | <0.001 | 0.029    | 0.732  | 0.597    |
| <b>Mexico 2015</b>     | 0.026           | 0.265    | <0.001 | 0.001    | <0.001 | <0.001   | 0.267  | 0.418    |
| <b>Nicaragua 2006</b>  | <0.001          | 0.005    | <0.001 | 0.001    | <0.001 | 0.017    | 0.019  | 0.087    |
| <b>Panama 2013</b>     | <0.001          | <0.001   | <0.001 | 0.004    | <0.001 | <0.001   | 0.004  | 0.023    |
| <b>Paraguay 2008</b>   | 0.003           | 0.041    | <0.001 | 0.118    | <0.001 | <0.001   | 0.022  | 0.420    |
| <b>Peru 2012</b>       | <0.001          | <0.01    | <0.001 | 0.956    | <0.001 | 0.273    | 0.478  | 0.724    |
| <b>Suriname 2010</b>   | 0.013           | 0.288    | 0.871  | 0.838    | 0.099  | 0.455    | <0.000 | 0.032    |
|                        | Afrodescendants |          |        |          |        |          |        |          |
| <b>Belize 2011</b>     | 0.517           | 0.207    | 0.067  | 0.002    | 0.516  | 0.357    | 0.537  | 0.183    |
| <b>Brazil 2006</b>     | 0.358           | 0.489    | 0.138  | 0.281    | 0.056  | 0.159    | NA     | NA       |
| <b>Colombia 2010</b>   | <0.001          | <0.001   | <0.001 | 0.218    | <0.001 | <0.001   | 0.003  | 0.033    |
| <b>Costa Rica 2011</b> | 0.356           | 0.347    | 0.216  | 0.554    | 0.038  | 0.066    | *      | *        |
| <b>Ecuador 2004</b>    | 0.404           | 0.535    | 0.582  | 0.893    | 0.109  | 0.105    | 0.682  | 0.964    |
| <b>Guyana 2014</b>     | 0.024           | 0.026    | 0.546  | 0.472    | 0.066  | 0.196    | 0.766  | 0.600    |

|                      |        |        |        |       |        |       |       |       |
|----------------------|--------|--------|--------|-------|--------|-------|-------|-------|
| <b>Honduras 2011</b> | 0.154  | 0.398  | 0.001  | 0.038 | 0.043  | 0.546 | 0.196 | 0.253 |
| <b>Panama 2013</b>   | 0.929  | 0.964  | 0.495  | 0.818 | 0.210  | 0.292 | 0.093 | 0.168 |
| <b>Suriname 2010</b> | <0.001 | <0.001 | <0.001 | 0.014 | <0.001 | 0.968 | 0.086 | 0.599 |
| <b>Uruguay 2012</b>  | NA     | NA     | 0.488  | 0.763 | 0.250  | 0.201 | NA    | NA    |

\*Sample size < 25. NA: not available.

Table S16 – Intervention coverage by ethnic group (white, brown, black and indigenous), Brazil, 2006.

| <b>Indicator/ ethnic group</b>              | <b>White</b> | <b>Brown</b> | <b>Black</b> | <b>Indigenous</b> |
|---------------------------------------------|--------------|--------------|--------------|-------------------|
| <b>Use of modern contraception</b>          | 76.6         | 75.6         | 72.9         | 72.5              |
| <b>Antenatal care (four or more visits)</b> | 92.6         | 89.4         | 88.5         | 82.9              |
| <b>Skilled attendant at delivery</b>        | 98.3         | 97.4         | 93.0         | 91.3              |
